# Supplementary material for: Combined Genomic, Transcriptomic, Proteomic, and Physiological Characterization of the Growth of Pecoramyces sp. F1 in Monoculture and Co-culture With a Syntrophic Methanogen
Source: Front Microbiol. 2019 Mar 6;10:435. doi: 10.3389/fmicb.2019.00435 (PMC6414434; doi:10.3389/fmicb.2019.00435)
Supplement: Supplementary file 1 [file Data_Sheet_1.xlsx]

## Sheet: Supplementary Table 1
Supplementary Table 1 Paired-end sequencing data for assembling the genome of Pecoramyces sp. F1
Insert size (bp)	Read length (bp)	Raw reads	Raw data (Mb)	Clean reads	Clean data (Mb)	Clean data (%)*
170	90:90	143811818	12943	125646180	11308	87.36
350	90:90	46455696	4181	39762664	3578	85.59
6000	90:90	314656898	28319	153197088	13787	48.58
*Reads with > 9 ambiguous bases were discarded. Adapter and duplication contamination reads were discarded. Reads with a mean quality score < 20 were discarded.

## Sheet: Supplementary Table 2
Supplementary Table 2 RNAseq mapping results
SampleID#	Reads length (bp)	Raw reads	Clean reads*	Reads mapped to genome (%)	Reads mapped to genes (%)	Expressed genes	Alternative splicing
Mm1	90:90	28517838	27461944	23,732,934 (86.42)	20,072,686 (73.09)	12158	7752
Mm2	90:90	28517762	27421684	23,583,400 (86.00)	19,676,380 (71.75)	12167	7796
Mm3	90:90	28517684	27496146	23,876,549 (86.84)	19,776,326 (71.92)	12458	9294
Lm1	90:90	28517720	27424040	23,157,015 (84.44)	19,094,266 (69.63)	11995	5366
Lm2	90:90	28517794	27384924	23,213,665 (84.77)	18,996,096 (69.37)	12206	6558
Lm3	90:90	28517768	27364160	22,977,331 (83.97)	18,585,614 (67.92)	11732	5800
Mc1	90:90	28517624	27437458	22,300,386 (81.28)	17,981,144 (65.54)	12533	7781
Mc2	90:90	28517788	27488464	21,852,800 (79.50)	17,923,234 (65.20)	11975	7538
Mc3	90:90	28517780	27482020	21,123,549 (76.86)	17,069,110 (62.11)	12017	7862
Lc1	90:90	28517742	27345102	21,767,326 (79.60)	17,016,858 (62.23)	10405	2321
Lc2	90:90	28517680	27370562	21,790,912 (79.61)	17,595,092 (64.28)	9742	1915
Lc3	90:90	28517782	27307144	21,795,720 (79.82)	17,135,628 (62.75)	9883	1947
#Mm1-3, mid-growth stage of monoculture, replicates 1-3; Lm1-3, late-growth stage of monoculture, replicates 1-3; Mc1-3, mid-growth stage of coculture, replicates 1-3; Lc1-3, late-growth stage of coculture, replicates 1-3. *Reads with > 9 ambiguous bases were discarded. Adapter contamination reads were discarded. Reads with a mean quality score < 20 were discarded.

## Sheet: Supplementary Table 3
Supplementary Table 3 The coefficient of determination (R2) between biological replicate pairs using RSEM-generated FPKM values
Sample#	Mm1	Mm2	Mm3	Lm1	Lm2	Lm3	Mc1	Mc2	Mc3	Lc1	Lc2	Lc3
Mm1	1	0.998812	0.991116	0.922009	0.922971	0.923008	0.954711	0.962762	0.961364	0.870703	0.886233	0.875983
Mm2	0.998812	1	0.990193	0.920065	0.921572	0.921488	0.954395	0.962441	0.961177	0.869305	0.883469	0.874181
Mm3	0.991116	0.990193	1	0.942057	0.944219	0.944614	0.971236	0.974188	0.972285	0.894816	0.902844	0.897568
Lm1	0.922009	0.920065	0.942057	1	0.99913	0.997968	0.984499	0.97025	0.972218	0.981548	0.986438	0.983653
Lm2	0.922971	0.921572	0.944219	0.99913	1	0.998946	0.987568	0.973792	0.975887	0.982618	0.984876	0.983116
Lm3	0.923008	0.921488	0.944614	0.997968	0.998946	1	0.987462	0.97334	0.976052	0.981309	0.981919	0.98141
Mc1	0.954711	0.954395	0.971236	0.984499	0.987568	0.987462	1	0.994489	0.995367	0.964482	0.964368	0.963243
Mc2	0.962762	0.962441	0.974188	0.97025	0.973792	0.97334	0.994489	1	0.998965	0.943903	0.946302	0.941784
Mc3	0.961364	0.961177	0.972285	0.972218	0.975887	0.976052	0.995367	0.998965	1	0.948628	0.950247	0.947032
Lc1	0.870703	0.869305	0.894816	0.981548	0.982618	0.981309	0.964482	0.943903	0.948628	1	0.992612	0.996276
Lc2	0.886233	0.883469	0.902844	0.986438	0.984876	0.981919	0.964368	0.946302	0.950247	0.992612	1	0.995916
Lc3	0.875983	0.874181	0.897568	0.983653	0.983116	0.98141	0.963243	0.941784	0.947032	0.996276	0.995916	1
#Mm1-3, mid-growth stage of monoculture, replicates 1-3; Lm1-3, late-growth stage of monoculture, replicates 1-3; Mc1-3, mid-growth stage of coculture, replicates 1-3; Lc1-3, late-growth stage of coculture, replicates 1-3.

## Sheet: Supplementary Table 4
Supplementary Table 4 Identification of proteins by iTRAQ
Set*	Total spectra	Matched spectra	Identified peptide	Identified protein
Set 1	288663	61668	13333	3394
Set 2	249517	80391	14378	3462
Set 3	292887	88433	16609	3987
*The 12 RNAseq samples were divided into 3 iTRAQ sets according to their replicate numbers (i.e. Mm1, Lm1, Mc1, Lc1 were included in Set 1).

## Sheet: Supplementary Table 5
Supplementary Table 5 Differentially expressed genes at the mid-growth stage (fold change > ±2 and divergence probability > 0.8)
GeneID	Log2(fold change)	NCBInr	GO function	KEGG
A15543	-9.50713	-	-	-
A06045	-9.01216	-	-	-
A03640	-8.86934	PREDICTED: LRR receptor-like serine	-	-
A14257	-8.86212	F5/8 type C domain protein, partial	-	-
A18279	-7.16887	Extracellular alpha amylase	Catalytic activity	-
A03239	-7.10177	Chitin binding protein, partial	Chitin binding	-
A16618	-6.91152	Rubrerythrin	Iron ion binding	-
A17342	-6.75576	Circumsporozoite protein	Protein binding	-
A16337	-6.32303	Conserved hypothetical protein	Catalytic activity	-
A06176	-5.85092	-	-	-
A02867	-5.79755	Hypothetical protein	-	-
A12645	-5.70079	Endo-1,3-1,4-beta-glucanase	Hydrolase activity, hydrolyzing O-glycosyl compounds	-
A00838	-5.39285	Endo-1,4-beta-xylanase	Catalytic activity	Endo-1,4-beta-xylanase [EC:3.2.1.8]
A14167	-5.32379	Fe-dependent oxidoreductase, alcohol dehydrogenase	Oxidoreductase activity	-
A04578	-5.25343	Putative polysaccharide lyase family 1	-	-
A12647	-5.16886	Lichenase	Hydrolase activity, hydrolyzing O-glycosyl compounds	Licheninase [EC:3.2.1.73]
A12644	-5.06746	Lichenase	Hydrolase activity, hydrolyzing O-glycosyl compounds	Licheninase [EC:3.2.1.73]
A05614	-5.04143	Alpha-amylase	-	-
A02695	-4.88198	Hypothetical protein AM1_1973	Protein binding	-
A05613	-4.82443	Alpha-amylase	-	-
A02030	-4.7477	Hypothetical protein KTR9_4847	-	-
A06680	-4.52501	Hypothetical protein	-	Membrane protease subunit HflC [EC:3.4.-.-]
A12651	-4.382	Lichenase	Hydrolase activity, hydrolyzing O-glycosyl compounds	Licheninase [EC:3.2.1.73]
A11361	-4.3262	Hypothetical protein	-	-
A11983	-4.08539	Methionine adenosyltransferase	-	-
A06177	-4.07614	-	-	-
A10819	-4.06711	-	-	-
A11268	-4.01486	Hypothetical protein	-	-
A02285	-3.89459	Hypothetical protein	-	-
A12194	-3.67707	-	-	-
A05952	-3.64137	Sortase and related acyltransferases	N-acetyltransferase activity	Phosphinothricin acetyltransferase [EC:2.3.1.183]
A00661	-3.6404	Metallo-beta-lactamase domain protein	Hydrolase activity	-
A06509	-3.62639	-	-	-
A13987	-3.6261	-	-	-
A16810	-3.60974	Hypothetical protein	-	-
A02868	-3.55061	Hypothetical protein	-	-
A04378	-3.52172	Hypothetical protein CXIVA_03460	Cation transmembrane transporter activity	-
A11177	-3.50809	-	-	-
A12516	-3.48224	Hypothetical protein AM1_1973	Protein binding	-
A17707	-3.38505	Putative cellulase	Protein domain specific binding	Spore coat protein H
A06290	-3.34588	Hypothetical protein BATDEDRAFT_89622	Chitin binding	-
A03944	-3.29942	Hypothetical protein RO3G_01445	Protein tyrosine/serine/threonine phosphatase activity	-
A01039	-3.28745	-	-	-
A01159	-3.2614	Hypothetical protein	-	-
A13993	-3.23012	Hypothetical protein	-	-
A02596	-3.22469	-	-	-
A02597	-3.22469	-	-	-
A06957	-3.17264	Hypothetical protein	-	-
A14963	-3.14533	Hypothetical protein Isop_3000	-	-
A10646	-3.09125	Membrane protease subunit, stomatin/prohibitin	-	-
A11108	-3.07427	Aconitate hydratase	Aconitate hydratase activity	Aconitate hydratase 1 [EC:4.2.1.3]
A01031	-3.07038	Beta-glucosidase	Hydrolase activity, hydrolyzing O-glycosyl compounds	-
A00819	-2.95222	Hypothetical protein BATDEDRAFT_89622	Chitin binding	Chitinase [EC:3.2.1.14]
A02346	-2.92261	Hypothetical protein	-	-
A04907	-2.85222	-	-	-
A02422	-2.84887	-	-	-
A11595	-2.83007	Hypothetical protein	-	-
A17294	-2.8155	Hypothetical protein BATDEDRAFT_33939, partial	Chitin binding	-
A17902	-2.74864	Iron hydrogenase precursor	Iron ion binding	NADH dehydrogenase I subunit G [EC:1.6.5.3]
A13837	-2.7469	-	Protein binding	-
A06146	-2.73091	-	-	-
A01342	-2.70277	-	-	-
A00774	-2.67215	Endo-1,4-beta-xylanase	Hydrolase activity, hydrolyzing O-glycosyl compounds	-
A02172	-2.67076	GCN5-like N-acetyltransferase	N-acetyltransferase activity	-
A07317	-2.67076	GCN5-like N-acetyltransferase	N-acetyltransferase activity	-
A16824	-2.65232	Hypothetical protein AOL_s00097g268	-	-
A04318	-2.64657	Hypothetical protein BATDEDRAFT_33939, partial	Chitin binding	-
A00385	-2.62472	Hypothetical protein RO3G_11882	-	-
A00573	-2.62269	RNase Sy	RNA binding	-
A16923	-2.61076	-	-	-
A06241	-2.61049	Quinolinate synthetase A protein, putative	Quinolinate synthetase A activity	Quinolinate synthase [EC:2.5.1.72]
A12824	-2.60757	PREDICTED: phosphatidate phosphatase PPAPDC1B-like	Catalytic activity	Phosphatidate phosphatase [EC:3.1.3.4]
A02918	-2.58659	1,4-beta-D-glucan-4-glucanohydrolase	Protein domain specific binding	-
A01617	-2.58281	-	-	-
A01625	-2.56904	Hypothetical protein BATDEDRAFT_21367	Chitin binding	-
A09522	-2.54965	Hypothetical protein O9G_005015	-	-
A10367	-2.49495	Fatty acid synthase	Fatty acid synthase activity	Fatty acid synthase subunit alpha, fungi type [EC:2.3.1.86]
A02580	-2.46312	-	-	-
A11503	-2.45121	-	-	-
A07959	-2.44344	-	Protein binding	-
A04466	-2.37729	Hypothetical protein BATDEDRAFT_33281	Oxidoreductase activity	-
A10482	-2.37224	Aconitate hydratase, partial	Aconitate hydratase activity	Aconitate hydratase 1 [EC:4.2.1.3]
A16032	-2.3324	-	-	-
A18447	-2.28431	Putative VV A32-like packaging ATPase	-	-
A15869	-2.26858	Hypothetical protein BATDEDRAFT_31463	NADH dehydrogenase (ubiquinone) activity	NADH dehydrogenase (ubiquinone) flavoprotein 1 [EC:1.6.5.3 1.6.99.3]
A13916	-2.26387	Cellulase	-	-
A01647	-2.24495	PREDICTED: LOW QUALITY PROTEIN: zonadhesin	Serine-type endopeptidase activity	Subtilase-type proteinase RRT12 [EC:3.4.21.-]
A03811	-2.23671	Fe-dependent oxidoreductase, alcohol dehydrogenase	Oxidoreductase activity	-
A06181	-2.20124	Lectin	Chitin binding	Glutathione S-transferase [EC:2.5.1.18]
A04148	-2.15791	-	Endopeptidase inhibitor activity	-
A00742	-2.15764	Transaldolase	Catalytic activity	-
A02111	-2.15626	Hypothetical protein HMPREF1544_09967	Binding	-
A06195	-2.13832	Hypothetical protein BATDEDRAFT_10115	Binding	-
A09479	-2.12908	-	-	-
A03770	-2.12019	Conserved Plasmodium protein	-	-
A14814	-2.11604	-	Transmembrane transporter activity	-
A11571	-2.11169	Formate C-acetyltransferase	Formate C-acetyltransferase activity	-
A08508	-2.05919	Histidine acid phosphatase family protein	Protein binding	Proprotein convertase subtilisin/kexin type 5 [EC:3.4.21.-]
A11257	-2.04507	Hypothetical protein, partial	-	-
A04583	-2.0414	Predicted protein	Ubiquitin-protein ligase activity	Uncharacterized protein
A08330	-2.03972	-	-	-
A05633	-2.03919	Hypothetical protein BATDEDRAFT_12524	Metal ion transmembrane transporter activity	-
A11977	-2.01238	-	-	-
A04895	-2.01084	Hypothetical protein RO3G_08755	Sequence-specific DNA binding transcription factor activity	-
A17052	-1.99272	-	-	-
A18120	-1.97138	Dihydroxy-acid dehydratase	Catalytic activity	Dihydroxy-acid dehydratase [EC:4.2.1.9]
A10660	-1.96854	Hypothetical protein	-	Proline iminopeptidase [EC:3.4.11.5]
A10890	-1.95221	-	-	-
A12659	-1.90938	-	-	-
A01349	-1.88717	Beta-glucosidase	-	-
A08809	-1.84808	-	-	-
A15331	-1.802	ORF24 gene product	-	-
A10561	-1.78619	Hypothetical protein KNAG_0E04210	Nucleotide binding	Glutamate dehydrogenase (NADP+) [EC:1.4.1.4]
A10168	-1.78037	Hypothetical protein BATDEDRAFT_21300	Actin binding	Wiskott-Aldrich syndrome protein
A06185	-1.71625	Hypothetical protein BATDEDRAFT_89622	Chitin binding	Glutathione S-transferase [EC:2.5.1.18]
A16082	-1.71364	Hypothetical protein	-	-
A16139	-1.69676	-	-	-
A07657	-1.66893	NADP(+)-dependent glutamate dehydrogenase	Oxidoreductase activity	Glutamate dehydrogenase (NADP+) [EC:1.4.1.4]
A04835	-1.6552	Hypothetical protein BATDEDRAFT_11556, partial	Protein kinase activity	Protein-serine/threonine kinase [EC:2.7.11.-]
A09429	-1.63972	Immunoglobulin G-binding protein A, partial	-	-
A10401	-1.5876	Leucine rich repeat protein	Protein binding	Internalin A
A08259	1.64767	-	-	-
A05400	1.71255	Transaldolase	Catalytic activity	-
A06564	1.74189	Hypothetical protein	Metal ion transmembrane transporter activity	Zinc transporter, ZIP family
A02175	1.76482	Hypothetical protein EGYY_15940	Nucleotide binding	ATP-binding cassette, subfamily B, bacterial
A00447	1.78666	Abortive infection protein	-	-
A17803	1.80036	Hypothetical protein ACD_20C00109G0034	-	-
A03277	1.83845	-	-	-
A14774	1.85477	Hexokinase 3	Hexokinase activity	-
A09790	1.86254	Hypothetical protein BATDEDRAFT_12524	Metal ion transmembrane transporter activity	-
A04622	1.88488	Predicted phosphohydrolases	Acid phosphatase activity	-
A00374	1.88707	Uncharacterized protein BN506_01556	-	-
A07953	1.94021	-	-	-
A18351	1.96578	Dehydrogenase	Nucleotide binding	-
A03754	1.97108	-	-	-
A00148	1.98186	Alanine transaminase	Catalytic activity	-
A16940	1.99597	Endo-1,4-beta-xylanase	Hydrolase activity, hydrolyzing O-glycosyl compounds	-
A10009	2.00667	-	-	-
A14099	2.01889	Abortive infection protein	-	-
A11699	2.04238	-	Protein kinase activity	-
A03207	2.08796	Putative cellulase, partial	Hydrolase activity, hydrolyzing O-glycosyl compounds	-
A13450	2.10014	Hypothetical protein BATDEDRAFT_33795	Nucleic acid binding	Pre-60S factor REI1
A05791	2.1183	Polysaccharide deacetylase	Chitin binding	-
A01860	2.12878	-	-	-
A13891	2.18774	Para-nitrobenzyl esterase, a/b hydrolase	-	-
A02719	2.22331	Endo-1,4-beta-xylanase	Hydrolase activity, hydrolyzing O-glycosyl compounds	-
A04623	2.27441	Ser/Thr protein phosphatase family protein	Acid phosphatase activity	Endoglucanase [EC:3.2.1.4]
A07251	2.28795	Hypothetical protein PFL1_06682	Zinc ion binding	-
A03070	2.36064	Hypothetical protein TBLA_0G02790	Protein binding	-
A03971	2.36449	-	-	-
A10906	2.37442	1,4-beta-D-glucan-cellobiohydrolase	Protein domain specific binding	-
A13546	2.44635	Methionine adenosyltransferase	Protein domain specific binding	-
A06584	2.449	Ser/Thr protein phosphatase family protein	Hydrolase activity	-
A05364	2.46496	Hypothetical protein PUNSTDRAFT_145461	Structural molecule activity	Vinculin
A12496	2.52686	-	-	-
A17800	2.54141	Alpha-amylase	Starch binding	Alpha-amylase [EC:3.2.1.1]
A15626	2.65567	Hypothetical protein HMPREF1544_09875	-	-
A11014	2.66925	Extracellular serine-rich protein, putative	-	-
A04323	2.72616	-	-	-
A05753	2.80396	Uncharacterized protein BN490_00040	Binding	-
A02477	2.82944	Uncharacterized protein conserved in bacteria	-	-
A13799	2.83955	Acetylxylan esterase	Hydrolase activity	-
A05755	2.84733	-	Binding	-
A00054	2.89647	-	-	-
A11456	2.98009	Deacetylase	Catalytic activity	-
A05503	3.1111	Putative cellulase	Hydrolase activity, hydrolyzing O-glycosyl compounds	-
A05754	3.27917	Hypothetical protein	Binding	-
A03737	3.29337	Hypothetical protein BATDEDRAFT_85662	-	-
A01594	3.31964	Putative cellulase	Protein domain specific binding	-
A10549	3.32114	gCN5-related N-acetyltransferase	N-acetyltransferase activity	-
A11367	3.34093	N-acetyltransferase GCN5	N-acetyltransferase activity	-
A09759	3.3943	-	-	-
A16262	3.4635	-	-	-
A06592	3.50325	Putative cellulase	Catalytic activity	-
A08689	3.53311	Putative cellulase	Hydrolase activity, hydrolyzing O-glycosyl compounds	-
A06074	4.06253	Cellobiohydrolase II-like cellulase CelI	Protein domain specific binding	-
A14029	4.46427	Putative cellulase	Protein domain specific binding	-
A00805	4.85663	Aldo/keto reductase diketogulonate reductase	Oxidoreductase activity	-
A04599	4.91807	Sugar transporter	Transporter activity	-
A14137	5.20605	Hypothetical protein	-	-
A11553	9.58057	-	-	-
A03863	10.1774	-	-	-
A07452	10.7816	-	-	-

## Sheet: Supplementary Table 6
Supplementary Table 6 Differentially expressed proteins at the mid-growth stage (P value < 0.05 and fold change > ±1.2 in at least two iTRAQ sets)
GeneID	Ratio	Uniprot_Swissprot	NCBInr	KEGG
A08105	0.427333	Endochitinase A	Hypothetical protein	Glutathione S-transferase [EC:2.5.1.18]
A16996	0.460667	Probable isoprenylcysteine alpha-carbonyl methylesterase ICMEL1	Uncharacterized protein	-
A00985	0.504667	Glutaredoxin-C1	Hypothetical protein AOL_s00006g226	Glutaredoxin 3
A04792	0.523333	Mannan endo-1,4-beta-mannosidase B	Putative cellulase	-
A11779	0.545333	26 kDa endochitinase 1	Hypothetical protein FPSE_07900	Glutathione S-transferase [EC:2.5.1.18]
A15646	0.553667	Enamine/imine deaminase	YjgF-like protein, partial	TdcF protein
A11651	0.571667	-	-	-
A07589	0.578333	Transcriptional activator HAP5	Hypothetical protein Ecym_5028	Nuclear transcription factor Y, gamma
A12393	0.587	-	Hypothetical protein	Alcohol dehydrogenase (NADP+) [EC:1.1.1.2]
A04227	0.593	Zinc-type alcohol dehydrogenase-like protein PB24D3.08c	Hypothetical protein BN14_10543	-
A12684	0.596667	Aqualysin-1	Hypothetical protein BATDEDRAFT_28553	-
A08578	0.597333	Protein translation factor sui1	Hypothetical protein BATDEDRAFT_84447	Translation initiation factor 1
A00819	0.607667	Chitinase 4	Brain chitinase and chia, putative	Chitinase [EC:3.2.1.14]
A06268	0.611333	Tubulin-specific chaperone A	Tubulin binding cofactor A	-
A06181	0.611667	Lectin-D2	Carbohydrate-binding module family 18 protein	Glutathione S-transferase [EC:2.5.1.18]
A07794	0.618333	Ketol-acid reductoisomerase, mitochondrial	Ketol-acid reductoisomerase	Ketol-acid reductoisomerase [EC:1.1.1.86]
A09942	0.623667	Peptidyl-prolyl cis-trans isomerase pin1	Peptidyl-prolyl cis/trans isomerase-like protein	Peptidyl-prolyl cis-trans isomerase NIMA-interacting 1 [EC:5.2.1.8]
A06150	0.624333	Calmodulin-like protein	Calcium-binding EF-hand	Solute carrier family 25 (mitochondrial phosphate transporter), member 23/24/25/41
A07027	0.626	V-type proton ATPase 116 kDa subunit a isoform 1	Vacuolar H+-ATPase V0 sector, subunit a	V-type H+-transporting ATPase subunit I [EC:3.6.3.14]
A10519	0.626333	Dipeptidyl-peptidase 5	Hypothetical protein MPER_12122	Dipeptidyl aminopeptidase [EC:3.4.14.-]
A01048	0.628333	-	Putative cellulase	-
A06907	0.633667	DNA-binding protein DDB_G0278111	Predicted protein	Programmed cell death protein 5
A09307	0.634	Acyl-CoA-binding protein homolog 1	Acyl-CoA-binding protein 2	Diazepam-binding inhibitor (GABA receptor modulator, acyl-CoA-binding protein)
A08214	0.634333	NADP-specific glutamate dehydrogenase	Glutamate dehydrogenase (NADP+)	Glutamate dehydrogenase (NADP+) [EC:1.4.1.4]
A02665	0.635667	-	-	-
A14009	0.637667	Calmodulin	Putative calmodulin protein	Calmodulin
A12595	0.638	Ribose-5-phosphate isomerase B	Ribose 5-phosphate isomerase B	Ribose 5-phosphate isomerase B [EC:5.3.1.6]
A11046	0.641333	-	-	-
A04839	0.642	Adenine phosphoribosyltransferase	Adenine phosphoribosyltransferase	Adenine phosphoribosyltransferase [EC:2.4.2.7]
A14167	0.643	NADH-dependent butanol dehydrogenase A	Alcohol dehydrogenase Adh4	Alcohol dehydrogenase [EC:1.1.1.1]
A00243	0.644667	-	-	-
A13483	0.647333	Cofilin	Hypothetical protein SCHCODRAFT_67009	Cofilin
A04366	0.65	Glutathione S-transferase A	Hypothetical protein TRIVIDRAFT_91258	Glutathione S-transferase [EC:2.5.1.18]
A04530	0.650333	ADP-ribosylation factor GTPase-activating protein AGD2	Hypothetical protein HMPREF1120_00604	Stromal membrane-associated protein
A07944	0.654333	V-type proton ATPase 16 kDa proteolipid subunit	Hypothetical protein MGL_1143	V-type H+-transporting ATPase 16kDa proteolipid subunit [EC:3.6.3.14]
A02871	0.657	Glyoxal reductase	Hypothetical protein TRIVIDRAFT_64039	Alcohol dehydrogenase (NADP+) [EC:1.1.1.2]
A16661	0.663667	Drebrin	Putative actin binding protein	-
A08809	0.666333	-	-	-
A17737	0.666333	17.8 kDa class I heat shock protein	Small heat shock protein	HSP20 family protein
A12733	0.670333	General stress protein 14	Putative nad h quinone family protein	-
A12092	0.671667	Advillin	Hypothetical protein BATDEDRAFT_10996	Gelsolin
A02172	0.672333	Uncharacterized N-acetyltransferase p20	Predicted protein	-
A12012	0.680667	-	-	-
A05015	0.681	Peptidyl-prolyl cis-trans isomerase F, mitochondrial	Peptidyl-prolyl cis-trans isomerase A1	Peptidylprolyl isomerase [EC:5.2.1.8]
A05766	0.681667	Adenylate cyclase	Carbohydrate esterase family 4 protein	Glutathione S-transferase [EC:2.5.1.18]
A08696	0.691333	UBX domain-containing protein 1-B	Hypothetical protein RO3G_08232	-
A09421	0.694333	Macrophage migration inhibitory factor homolog	Tautomerase/MIF	Phenylpyruvate tautomerase [EC:5.3.2.1]
A08560	0.704333	Aspartate--ammonia ligase	Asparagine synthetase A (asnA)	-
A14365	0.705333	Ubiquitin-conjugating enzyme spm2	Hypothetical protein BATDEDRAFT_85134	Ubiquitin-conjugating enzyme E2 variant
A01031	0.708333	Beta-glucosidase (Fragment)	Beta-glucosidase	Beta-glucosidase [EC:3.2.1.21]
A16618	0.709	Rubrerythrin-1	-	-
A17803	0.714	Probable cytokinin riboside 5'-monophosphate phosphoribohydrolase LOGL10	Hypothetical protein BN7_5533	-
A10789	0.715	Serpin B8	Cellulosomal serpin precursor	Serpin B
A07534	0.716667	Probable homoisocitrate dehydrogenase	Hypothetical protein RO3G_11022	Homoisocitrate dehydrogenase [EC:1.1.1.87]
A10747	0.717333	Zinc finger CCCH domain-containing protein 12	Member of the CCCH zinc finger family	Translation initiation factor 5
A14852	0.719333	Uncharacterized GTP-binding protein YjiA	Hypothetical protein COCHEDRAFT_1174467	-
A08974	0.720667	Probable Rho-type GTPase-activating protein 2	Hypothetical protein SERLA73DRAFT_117654	RalA-binding protein 1
A17573	0.721	MOB kinase activator 1A	Hypothetical protein BATDEDRAFT_30301	Maintenance of ploidy protein MOB1 (MPS1 binder 1)
A03282	0.723667	ADP-ribosylation factor GTPase-activating protein AGD3	Putative ADP-ribosylation factor GTPase-activating protein AGD9	ADP-ribosylation factor GTPase-activating protein 2/3
A15615	0.726667	Pyruvate formate-lyase-activating enzyme	Pyruvate formate lyase activating enzyme	-
A15444	0.727	Profilin-2	Hypothetical protein BATDEDRAFT_14302	Profilin
A00485	0.727	Lectin-D2	Hypothetical protein MGG_05351	Adenylate cyclase [EC:4.6.1.1]
A12546	0.729333	Septum-promoting GTP-binding protein 1	Hypothetical protein AN7206.2	Rab family, other
A01922	0.729333	Protein GCY	Hypothetical protein BATDEDRAFT_13322	-
A13525	0.731333	Endoglucanase B	Mannanase ManA	-
A00033	0.732	cAMP-dependent protein kinase catalytic subunit gamma (Fragment)	Hypothetical protein BATDEDRAFT_36064	Protein kinase A [EC:2.7.11.11]
A14163	0.732667	Dual specificity mitogen-activated protein kinase kinase 1	Hypothetical protein MPER_12763	Mitogen-activated protein kinase kinase [EC:2.7.12.2]
A16775	0.732667	NADP-specific glutamate dehydrogenase	Glutamate dehydrogenase (NADP+)	Glutamate dehydrogenase (NADP+) [EC:1.4.1.4]
A04686	0.734	Serine/threonine-protein kinase pakG	STE/STE20/YSK protein kinase	Non-specific serine/threonine protein kinase [EC:2.7.11.1]
A15407	0.734	Protein DJ-1	Hypothetical protein BATDEDRAFT_90689	Protein DJ-1
A00359	0.735333	Endochitinase	Class V chitinase	Glutathione S-transferase [EC:2.5.1.18]
A01705	0.737	Coactosin	Hypothetical protein BATDEDRAFT_89530	-
A04770	0.737333	Enoate reductase 1	Hypothetical protein BN14_12101	12-oxophytodienoic acid reductase [EC:1.3.1.42]
A05798	0.740333	Cofilin	Probable COF1-cofilin, actin binding and severing protein	Cofilin
A07057	0.743333	-	-	-
A03623	0.744667	Rho GTPase-activating protein 39 (Fragment)	Hypothetical protein BATDEDRAFT_91387	-
A06865	0.746333	Protein sum2	Hypothetical protein RO3G_01793	-
A14769	0.746667	Ferrous iron transport protein B	-	-
A15916	0.751	Cysteine synthase	Cys4 cystathionine beta-synthase	Cystathionine beta-synthase [EC:4.2.1.22]
A02260	0.751667	Peptidyl-prolyl cis-trans isomerase H	Hypothetical protein BATDEDRAFT_30657	Peptidyl-prolyl isomerase H (cyclophilin H) [EC:5.2.1.8]
A17507	0.751667	-	Hypothetical protein BATDEDRAFT_35458	-
A17052	0.752667	-	-	-
A15198	0.753333	-	-	-
A18619	0.754667	-	Hypothetical protein RO3G_04702	-
A05693	0.757333	-	-	-
A10964	0.759	EH domain-containing protein 3	Hypothetical protein BATDEDRAFT_14976	-
A13908	0.759667	Agglutinin isolectin 2	Hypothetical protein	Glutathione S-transferase [EC:2.5.1.18]
A13999	0.760333	Phosphoribosylaminoimidazole-succinocarboxamide synthase	Phosphoribosylaminoimidazole-succinocarboxamide synthase	Phosphoribosylaminoimidazole-succinocarboxamide synthase [EC:6.3.2.6]
A15571	0.760667	-	Hypothetical protein BATDEDRAFT_28764	-
A11577	0.761333	-	-	-
A04365	0.761667	Protein HOS4	Hypothetical protein BATDEDRAFT_87290	-
A04666	0.763	Probable glucose-repressible alcohol dehydrogenase transcriptional effector homolog	Hypothetical protein MGG_05351	Adenylate cyclase [EC:4.6.1.1]
A09121	0.763333	Vacuolar protein sorting-associated protein 9a	Predicted protein	-
A11575	0.764333	Uncharacterized protein aq_2135	Hypothetical protein COCSADRAFT_199303, partial	Hydroxyacylglutathione hydrolase [EC:3.1.2.6]
A09166	0.765	Probable protein phosphatase 2C 33	Hypothetical protein BATDEDRAFT_36775	Protein phosphatase 2C homolog 2/3 [EC:3.1.3.16]
A15762	0.765667	3-isopropylmalate dehydrogenase	3-isopropylmalate dehydrogenase	3-isopropylmalate dehydrogenase [EC:1.1.1.85]
A00405	0.766333	Adenosine kinase	Hypothetical protein BATDEDRAFT_36383	Adenosine kinase [EC:2.7.1.20]
A02324	0.766667	Maternal embryonic leucine zipper kinase	Hypothetical protein MELLADRAFT_51841	Carbon catabolite-derepressing protein kinase [EC:2.7.11.1]
A12970	0.767	Ubiquitin-conjugating enzyme E2 4	Pc20g07930	Ubiquitin-conjugating enzyme E2 D/E [EC:6.3.2.19]
A08859	0.768	Calcium-binding protein 39	Hypothetical protein BATDEDRAFT_17877	Calcium binding protein 39
A10115	0.768667	Protein YSC84	DUF500-domain-containing protein	-
A15778	0.769333	Protein ras-2	Hypothetical protein RO3G_05138	Ras family, other
A04427	0.770333	LL-diaminopimelate aminotransferase	Kynurenine/alpha-aminoadipate aminotransferase mitochondrial precursor, partial	Kynurenine aminotransferase [EC:2.6.1.7]
A00163	0.771	Lectin-D2	Hypothetical protein FOXB_08206	-
A17607	0.772667	Enhancer of rudimentary homolog	Hypothetical protein BATDEDRAFT_89895	-
A10344	0.773667	Ribulose-phosphate 3-epimerase, cytoplasmic isoform	Hypothetical protein BATDEDRAFT_13975	Ribulose-phosphate 3-epimerase [EC:5.1.3.1]
A08985	0.777	Guanine nucleotide-binding protein-like 3 homolog	Hypothetical protein RO3G_06983	Nuclear GTP-binding protein
A12040	0.779333	-	-	-
A11674	0.780667	UPF0368 protein YPL225W	Hypothetical protein BATDEDRAFT_85735	D-lactate dehydrogenase (cytochrome) [EC:1.1.2.4]
A03644	0.783667	Glyoxal reductase	Hypothetical protein TRIATDRAFT_35681	Sce:YOR120W|[EC:1.1.1.-]
A02833	0.783667	Uncharacterized protein At1g03900	Adaptin ear-binding coat-associated protein 2	-
A04466	0.787	NADH dehydrogenase [ubiquinone] flavoprotein 2, mitochondrial	NADH-ubiquinone oxidoreductase 24kDa subunit	NADH dehydrogenase (ubiquinone) flavoprotein 2 [EC:1.6.5.3 1.6.99.3]
A12978	0.787	Lectin-C	Hypothetical protein	Glutathione S-transferase [EC:2.5.1.18]
A10327	0.787667	Serine/threonine-protein kinase YPK2/YKR2	Serine threonine-protein kinase gad8	Non-specific serine/threonine protein kinase [EC:2.7.11.1]
A00890	0.790667	Sorting nexin-3	Sorting nexin-3	-
A13640	0.791667	Leucine carboxyl methyltransferase 1	Hypothetical protein BATDEDRAFT_86819	-
A03767	0.794667	Pyruvate formate-lyase 1-activating enzyme	Pyruvate formate lyase activating enzyme	-
A14809	0.795667	Replication factor C subunit 2	Rfc4p	Replication factor C subunit 2/4
A17981	0.796	DEAD-box ATP-dependent RNA helicase 56	ATP dependent RNA helicase	ATP-dependent RNA helicase UAP56/SUB2 [EC:3.6.4.13]
A02081	0.796667	Probable Rho-type GTPase-activating protein 4	Hypothetical protein	RalA-binding protein 1
A07340	0.797	UPF0098 protein YbcL	Hypothetical protein AKAW_07204	-
A13613	0.797667	Uncharacterized protein ZC395.10	Protein wos2, putative	-
A10705	0.798	Ubiquitin-conjugating enzyme E2 N	Hypothetical protein UM03686.1	Ubiquitin-conjugating enzyme E2 N [EC:6.3.2.19]
A09370	0.801	Ferrous iron transport protein B	-	-
A01647	0.801333	Subtilisin-like protease 4	Peptidase 1	Subtilase-type proteinase RRT12 [EC:3.4.21.-]!K01336|3|3e-12|73.6|ani:AN0238.2|cerevisin [EC:3.4.21.48]
A10963	0.802	EH domain-containing protein 1	Hypothetical protein BATDEDRAFT_14976	-
A07770	0.805	Heat shock protein SSA2	Heat shock 70 kDa protein	Heat shock 70kDa protein 1/8
A00398	0.805333	Synaptobrevin homolog ykt6	Hypothetical protein BATDEDRAFT_11757	Synaptobrevin homolog YKT6
A05331	0.805667	Serine/threonine-protein kinase par-1	Hypothetical protein BATDEDRAFT_10042, partial	Carbon catabolite-derepressing protein kinase [EC:2.7.11.1]
A14402	0.807	Mannose-6-phosphate isomerase	Phosphomannose isomerase type I	Mannose-6-phosphate isomerase [EC:5.3.1.8]
A10570	0.807	tRNA (cytosine-5-)-methyltransferase	Hypothetical protein RO3G_12398	tRNA (cytosine38-C5)-methyltransferase [EC:2.1.1.204]
A12133	0.808	Endochitinase 1	Class V chitinase, putative	Glutathione S-transferase [EC:2.5.1.18]
A05801	0.808333	L-azetidine-2-carboxylic acid acetyltransferase	Conserved hypothetical protein	-
A18184	0.808333	Uncharacterized glycosyltransferase RBE_0706	Glycosyltransferase family 2 protein	Dolichyl-phosphate beta-glucosyltransferase [EC:2.4.1.117]
A10743	0.810333	13 kDa ribonucleoprotein-associated protein	Ribonucleoprotein-associated protein	U4/U6 small nuclear ribonucleoprotein SNU13
A02907	0.812333	40S ribosomal protein S21	Hypothetical protein BATDEDRAFT_10024, partial	Small subunit ribosomal protein S21e
A15694	0.812667	Mannose-1-phosphate guanyltransferase alpha	Hypothetical protein BATDEDRAFT_33853	Mannose-1-phosphate guanylyltransferase [EC:2.7.7.13]
A01551	0.812667	-	hypothetical protein FG07806.1 [Gibberella zeae PH-1]	-
A17141	0.812667	Ras-related protein Rap-1A	Hypothetical protein BATDEDRAFT_23334	Ras family
A03858	0.814	Ribosomal protein S6 kinase alpha-5	HHypothetical protein BN14_05495	Protein-serine/threonine kinase [EC:2.7.11.-]
A10898	0.814	Heat shock protein HSS1	Hsp71-like protein	Heat shock 70kDa protein 1/8
A01186	0.816333	ATP-dependent RNA helicase FAL1	ATP-dependent RNA helicase FAL1	ATP-dependent RNA helicase [EC:3.6.4.13]
A07269	0.818	Guanylate kinase	Guanylate kinase	Guanylate kinase [EC:2.7.4.8]
A04288	0.818667	-	-	-
A09264	0.823	Glucosamine 6-phosphate N-acetyltransferase 1	Hypothetical protein MPER_10956	Glucosamine-phosphate N-acetyltransferase [EC:2.3.1.4]
A11224	0.824	Uncharacterized Nudix hydrolase P35G2.12	Hypothetical protein NEUTE2DRAFT_51861	ADP-ribose pyrophosphatase [EC:3.6.1.13]
A16880	0.825333	-	-	-
A09318	0.826667	Kynurenine/alpha-aminoadipate aminotransferase, mitochondrial	Hypothetical protein BATDEDRAFT_12325	Tryptophan aminotransferase [EC:2.6.1.27]
A10490	0.829	AP-1 complex subunit gamma	Hypothetical protein MPER_04875	AP-1 complex subunit gamma-1
A03967	0.829667	Putative ankyrin repeat protein RBE_0317	Hypothetical protein ANI_1_1844094	26S proteasome non-ATPase regulatory subunit 10
A11372	0.830667	LAS seventeen-binding protein 1	Cell division control protein 25	Gdp/GTP exchange factor required for growth at low temperatures
A12965	0.831	-	Hypothetical protein RO3G_00904	-
A07318	0.832	Orotidine 5'-phosphate decarboxylase	Orotidine-5'-monophosphate decarboxylase	Orotidine-5'-phosphate decarboxylase [EC:4.1.1.23]
A15619	0.835	Guanine nucleotide-binding protein alpha-8 subunit	Guanine nucleotide-binding protein alpha-3 subunit	Guanine nucleotide-binding protein subunit alpha, other
A01778	0.837667	Protein JLP2	Hypothetical protein CPSG_01274	-
A14022	0.839667	6-phosphofructo-2-kinase/fructose-2,6-bisphosphatase 4	Predicted protein	6-phosphofructo-2-kinase / fructose-2,6-bisphosphatase [EC:2.7.1.105 3.1.3.46]
A02225	0.84	5'-methylthioadenosine/S-adenosylhomocysteine nucleosidase	-	-
A08097	0.841	40S ribosomal protein S12	Probable 40S ribosomal protein S12	Small subunit ribosomal protein S12e
A09732	0.844333	-	-	-
A00125	0.845667	Carbon catabolite-derepressing protein kinase	Hypothetical protein BATDEDRAFT_13121	Carbon catabolite-derepressing protein kinase [EC:2.7.11.1]
A10243	0.852	Tryptophan synthase beta chain 1	Tryptophan synthase involved in tryptophan biosynthesis	Tryptophan synthase beta chain [EC:4.2.1.20]
A01549	0.857	Leukotriene A-4 hydrolase	Hypothetical protein MPER_02716	Leukotriene-A4 hydrolase [EC:3.3.2.6]
A00208	1.15	Ribosome production factor 2 homolog	Hypothetical protein MPER_04228	Ribosome production factor 2
A11863	1.17	Nuclear pore complex protein Nup153	Predicted protein	-
A10585	1.17	Phosphoribosyl-AMP cyclohydrolase	Tri-functional histidine biosynthesis protein	Phosphoribosyl-ATP pyrophosphohydrolase / phosphoribosyl-AMP cyclohydrolase / histidinol dehydrogenase [EC:3.6.1.31 3.5.4.19 1.1.1.23]
A15710	1.18	Severin	Gelsolin-like protein 1	Gelsolin
A14819	1.18	40S ribosomal protein S26-B	40S ribosomal protein S26	Small subunit ribosomal protein S26e
A08089	1.18	Calreticulin	Hypothetical protein BATDEDRAFT_20750	Calnexin
A01063	1.19	Uridine-cytidine kinase 2	Uridine-cytidine kinase	Uridine kinase [EC:2.7.1.48]
A11917	1.19	Demethylmenaquinone methyltransferase	UbiE/COQ5 methyltransferase, putative	Sterol 24-C-methyltransferase [EC:2.1.1.41]
A03228	1.2	Protein disulfide-isomerase (Fragment)	Disulfidisomerase	Protein disulfide-isomerase A6 [EC:5.3.4.1]
A16950	1.2	Inner spore coat protein H	Putative cellulase	-
A07983	1.2	Nucleolin	RNA-binding domain-containing protein	Nucleolin
A09746	1.2	ATP-binding cassette sub-family B member 5	Hypothetical protein BATDEDRAFT_15754	ATP-binding cassette, subfamily B (MDR/TAP), member 1
A01918	1.2	Coproporphyrinogen-III oxidase, aerobic	Putative coproporphyrinogen oxidase	Coproporphyrinogen III oxidase [EC:1.3.3.3]
A12241	1.2	Basic leucine zipper and W2 domain-containing protein 1-A	Hypothetical protein RO3G_16256	-
A07724	1.21	Serine/arginine-rich splicing factor 9	Hypothetical protein TREMEDRAFT_56308	Splicing factor, arginine/serine-rich 4/5/6
A16591	1.21	-	-	-
A06699	1.21	Uncharacterized protein B0303.7	Hypothetical protein BATDEDRAFT_91681	-
A16365	1.21	-	-	-
A12418	1.21	Rhamnogalacturonan acetylesterase	Rhamnogalacturonan acetylesterase	Rhamnogalacturonan acetylesterase [EC:3.1.1.86]
A05251	1.22	-	-	-
A13773	1.22	-	Hypothetical protein BATDEDRAFT_86838	-
A10874	1.22	Thioredoxin	Thioredoxin	Protein disulfide-isomerase A6 [EC:5.3.4.1]
A09833	1.22	Pentafunctional AROM polypeptide	Arom polypeptide	Pentafunctional AROM polypeptide [EC:4.2.3.4 4.2.1.10 1.1.1.25 2.7.1.71 2.5.1.19]
A02089	1.22	Hypoxanthine-guanine phosphoribosyltransferase	Hypothetical protein RO3G_10449	-
A04887	1.22	Tryptophan synthase beta chain 1	Tryptophan synthase subunit beta	Tryptophan synthase beta chain [EC:4.2.1.20]
A01542	1.23	Galactomannan galactosyltransferase 1	Hypothetical protein MAC_07041	-
A01540	1.23	-	-	-
A09215	1.23	-	-	-
A01432	1.23	Ornithine carbamoyltransferase, mitochondrial	Mitochondrial ornithine carbamoyltransferase	Ornithine carbamoyltransferase [EC:2.1.3.3]
A11396	1.24	Hexose transporter 2	Sugar transporter	MFS transporter, SP family, sugar:H+ symporter
A12167	1.24	Thioredoxin domain-containing protein 5	Hypothetical protein PGTG_08757	Protein disulfide-isomerase [EC:5.3.4.1]
A17569	1.25	Protein tumorous imaginal discs, mitochondrial	Hypothetical protein PGUG_04241	DnaJ-related protein SCJ1
A04532	1.25	60S ribosomal protein L24-A	Hypothetical protein MGL_2586	Large subunit ribosomal protein L24e
A15397	1.25	Heat shock protein 60, mitochondrial	Heat shock protein 60	Chaperonin GroEL
A02072	1.25	-	-	-
A05221	1.25	Actin-binding protein F	Hypothetical protein RO3G_08882	-
A09829	1.25	DNA topoisomerase 1	DNA topoisomerase I	DNA topoisomerase I [EC:5.99.1.2]
A15653	1.26	Klotho	Beta-glucosidase	Beta-glucosidase [EC:3.2.1.21]
A00173	1.26	-	Hypothetical protein RO3G_08029	-
A04913	1.26	Putative nucleosome assembly protein 1-like 6	Hypothetical protein AG1IA_09365	Nucleosome assembly protein 1-like 1
A05079	1.27	Putative ankyrin repeat protein MM_0045	Ankyrin repeat domain-containing protein 50	-
A09064	1.27	Transketolase 1	Hypothetical protein BATDEDRAFT_88683	Transketolase [EC:2.2.1.1]
A05704	1.28	LINE-1 reverse transcriptase homolog	Hypothetical protein NCER_102544	Chitin deacetylase [EC:3.5.1.41]
A02180	1.28	Mannan endo-1,4-beta-mannosidase B	Putative cellulase	-
A09099	1.28	-	-	-
A02511	1.29	Thioredoxin-1	Chain A, Solution Structure Of The A' Domain Of Thermophilic Fungal Protein Disulfide Isomerase	Protein disulfide-isomerase A1 [EC:5.3.4.1]
A05371	1.29	-	Polyketide synthase	Aspyridone synthetase, hybrid polyketide synthase / nonribosomal peptide synthetase
A14687	1.29	Long-chain-fatty-acid--CoA ligase 6	Long-chain-fatty-acid-CoA ligase	Long-chain acyl-CoA synthetase [EC:6.2.1.3]
A16747	1.29	Uncharacterized 30.6 kDa protein in fumA 3'region	Deacetylase	Chitin deacetylase [EC:3.5.1.41]
A05007	1.29	Putative uracil phosphoribosyltransferase	PRTase-like protein	Uracil phosphoribosyltransferase [EC:2.4.2.9]
A07173	1.29	Ankyrin repeat domain-containing protein 5	Ankyrin repeat protein	26S proteasome non-ATPase regulatory subunit 10
A12977	1.3	Root-specific lectin	Hypothetical protein	Chitinase [EC:3.2.1.14]
A04518	1.3	-	-	-
A03432	1.31	-	-	-
A13644	1.31	Hydroxymethylglutaryl-CoA synthase A	Hypothetical protein	Hydroxymethylglutaryl-CoA synthase [EC:2.3.3.10]
A12413	1.31	Rhamnogalacturonan acetylesterase	Hypothetical protein AG1IA_03184	Rhamnogalacturonan acetylesterase [EC:3.1.1.86]
A03410	1.31	Aldose 1-epimerase	Hypothetical protein BATDEDRAFT_29046	Aldose 1-epimerase [EC:5.1.3.3]
A01863	1.31	Bifunctional xylanase/deacetylase	Hypothetical protein GGTG_14133	Chitin deacetylase [EC:3.5.1.41]
A11474	1.32	-	-	-
A13010	1.33	Demethylmenaquinone methyltransferase	Hypothetical protein FPSE_06271	-
A11692	1.33	Endochitinase	Root-specific lectin	Chitinase [EC:3.2.1.14]
A04324	1.33	60S ribosomal protein L27a (Fragment)	Putative 60S ribosomal protein L27A	Chromosome transmission fidelity protein 1 [EC:3.6.4.13]
A00084	1.35	Chondramide synthase cmdD	Cyclosporine synthetase	N-(5-amino-5-carboxypentanoyl)-L-cysteinyl-D-valine synthase [EC:6.3.2.26]
A04318	1.35	Lectin-D2	Carbohydrate esterase family 4 protein	Chitinase [EC:3.2.1.14]
A17940	1.36	1,4-alpha-glucan-branching enzyme	Unnamed protein product, partial	1,4-alpha-glucan branching enzyme [EC:2.4.1.18]
A13443	1.36	Putative G3BP-like protein	Ubiquitin protease cofactor Glp1 (predicted)	-
A05755	1.37	-	-	-
A01653	1.37	-	-	-
A10850	1.38	Sporulation-specific protein 5	Hypothetical protein RO3G_07640	Polyadenylate-binding protein
A04978	1.38	-	-	-
A01537	1.39	-	-	-
A04859	1.39	-	-	-
A12584	1.41	-	-	-
A00085	1.43	High-molecular-weight protein 2	Alpha-aminoadipyl-cysteinyl-valine synthetase	N-(5-amino-5-carboxypentanoyl)-L-cysteinyl-D-valine synthase [EC:6.3.2.26]
A00456	1.44	Inner spore coat protein H	Hypothetical protein RO3G_08029	-
A06205	1.45	Probable UDP-glucose 6-dehydrogenase 2	Hypothetical protein RO3G_07219	UDPglucose 6-dehydrogenase [EC:1.1.1.22]
A11859	1.46	Bifunctional xylanase/deacetylase	Hypothetical protein GGTG_14133	Chitin deacetylase [EC:3.5.1.41]
A13898	1.47	Tyrocidine synthase 2	Related to non-ribosomal peptide synthetase	N-(5-amino-5-carboxypentanoyl)-L-cysteinyl-D-valine synthase [EC:6.3.2.26]
A04287	1.47	-	-	-
A17916	1.47	ABC transporter ATP-binding protein ARB1	Hypothetical protein BATDEDRAFT_18221	ATP-binding cassette, subfamily F, member 2
A00196	1.47	Uncharacterized protein aq_2135	TPR_2 domain-containing protein	Hydroxyacylglutathione hydrolase [EC:3.1.2.6]
A02175	1.48	Iron-sulfur clusters transporter ATM1, mitochondrial	DEHA2B03894p	ATP-binding cassette, subfamily B (MDR/TAP), member 1
A04258	1.48	Chitooligosaccharide deacetylase	Chitin deacetylase	Chitin deacetylase [EC:3.5.1.41]
A03509	1.5	Glucose-repressible alcohol dehydrogenase transcriptional effector	Hypothetical protein VICG_00233	CCR4-NOT transcription complex subunit 6
A09019	1.52	Uncharacterized 30.6 kDa protein in fumA 3'region	Hypothetical protein RO3G_01608	Chitin deacetylase [EC:3.5.1.41]
A17368	1.53	Putative 8-amino-7-oxononanoate synthase	Putative polyketide protein	Hybrid polyketide synthase / nonribosomal peptide synthetase ACE1
A13416	1.53	Polyadenylate-binding protein 5	Hypothetical protein PGTG_00626	Polyadenylate-binding protein 2
A04195	1.56	Mannan endo-1,4-beta-mannosidase C	Glycosyl hydrolase family 6 exoglucanase	-
A04022	1.56	Renin receptor	Hypothetical protein PGUG_04061	-
A00805	1.57	Glyoxal reductase	DEHA2F02948p	Alcohol dehydrogenase (NADP+) [EC:1.1.1.2]
A06180	1.58	Lectin-D2	Putative glycosyl family protein	Chitinase [EC:3.2.1.14]
A10361	1.58	-	Hypothetical protein RO3G_01117	-
A01190	1.61	Elongation factor Tu	Mitochondrial translation elongation factor	Elongation factor Tu
A03192	1.61	Uncharacterized protein yfbK	U-box domain-containing protein	-
A06756	1.62	Subtilase-type proteinase psp3	Hypothetical protein AOL_s00080g47	Cerevisin [EC:3.4.21.48]
A13891	1.65	Carboxylesterase 5A (Fragment)	Carboxylesterase	Carboxylesterase 2 [EC:3.1.1.1 3.1.1.84 3.1.1.56]
A13370	1.66	Bifunctional endo-1,4-beta-xylanase A	Acetylxylan esterase	-
A09017	1.68	Uncharacterized 30.6 kDa protein in fumA 3'region	Hypothetical protein RO3G_16202	Chitin deacetylase [EC:3.5.1.41]
A05393	1.69	High-affinity glucose transporter ght5	Hypothetical protein NDAI_0F01930	MFS transporter, SP family, sugar:H+ symporter
A10456	1.76	Probable glucose transporter HXT5	Hypothetical protein TDEL_0E02300	MFS transporter, SP family, sugar:H+ symporter
A00812	1.78	-	Hypothetical protein FOXB_00994	Chitin deacetylase [EC:3.5.1.41]
A08706	1.79	Beta-glucosidase	Beta-glucosidase	Beta-glucosidase [EC:3.2.1.21]
A00416	1.8	Endo-1,4-beta-xylanase A	Xylanase	Endo-1,4-beta-xylanase [EC:3.2.1.8]
A09878	1.81	Severin	Gelsolin domain-containing putative protein	Gelsolin
A01843	1.85	Uncharacterized symporter ynaJ	-	-
A06460	2	Uncharacterized 30.6 kDa protein in fumA 3'region	Hypothetical protein SNOG_15047	Chitin deacetylase [EC:3.5.1.41]
A12837	2.01	-	-	-
A15678	2.1	-	-	-
A14498	2.14	ABC transporter A family member 1	ATP-binding cassette sub-family A member 8-A, partial	ATP-binding cassette, subfamily B (MDR/TAP), member 1
A08103	2.14	D-xylose-proton symporter	Hypothetical protein CERSUDRAFT_87353	MFS transporter, SP family, sugar:H+ symporter
A11958	2.18	ATP-binding cassette sub-family A member 1	ATP-binding cassette sub-family A member 8-A, partial	ATP-binding cassette, subfamily B (MDR/TAP), member 1
A15978	2.29	Uncharacterized symporter ynaJ	-	-
A17203	2.29	-	-	-
A01230	2.45	-	-	-
A10968	2.68	-	-	-
A11918	2.82	Ubiquinone/menaquinone biosynthesis methyltransferase ubiE	Trans-aconitate 2-methyltransferase	Sterol 24-C-methyltransferase [EC:2.1.1.41]
A10870	2.95	-	-	-

## Sheet: Supplementary Table 7
Supplementary Table 7 Differentially expressed genes at the late-growth stage (fold change > ±2 and divergence probability > 0.8)
GeneID	Log2(fold change)	NCBInr	GO function	KEGG
A14983	-10.5065	-	-	-
A18355	-10.4553	-	-	-
A11982	-10.1853	Putative uncharacterized protein	-	-
A12645	-10.0191	Endo-1,3-1,4-beta-glucanase	Hydrolase activity, hydrolyzing O-glycosyl compounds	-
A10479	-9.97823	Cellulase	Protein domain specific binding	-
A13908	-9.87242	Hypothetical protein BATDEDRAFT_27702	Protein binding	-
A13113	-9.81164	Beta-glucosidase	-	-
A05614	-9.73407	Alpha-amylase	-	-
A14764	-9.69349	Pyruvate kinase, partial	Magnesium ion binding	-
A06138	-9.68416	Endoglucanase B	Protein domain specific binding	-
A06509	-9.61961	-	-	-
A07248	-9.61287	Feruloyl esterase B	Protein domain specific binding	Polyhydroxybutyrate depolymerase
A04230	-9.58183	Hypothetical protein Rcas_3156	-	-
A06290	-9.58057	Hypothetical protein BATDEDRAFT_89622	Chitin binding	-
A00428	-9.55778	Hypothetical protein THITE_2110554	-	-
A07746	-9.48113	-	-	-
A18358	-9.44708	AmyE alpha-amylase	Starch binding	-
A13667	-9.28771	Hypothetical protein RO3G_08192	-	-
A14073	-9.27922	Lectin	Protein binding	-
A06176	-9.19722	-	-	-
A07952	-9.15144	-	-	-
A05031	-9.14636	Hypothetical protein BATDEDRAFT_8864	-	-
A11146	-9.11721	-	-	-
A05764	-9.05257	Hypothetical protein BATDEDRAFT_89622	Chitin binding	-
A03074	-9.05076	Hypothetical protein BATDEDRAFT_20192	Rab GTPase activator activity	-
A01708	-8.96482	Hypothetical protein BATDEDRAFT_85573	Chitin binding	-
A18254	-8.95904	-	-	-
A05613	-8.94947	Alpha-amylase	-	-
A07352	-8.94642	-	-	-
A13928	-8.92382	P-loop containing nucleoside triphosphate hydrolase domain-containing protein	-	-
A11175	-8.91986	Aldo/keto reductase diketogulonate reductase	Oxidoreductase activity	Aldehyde reductase [EC:1.1.1.21]
A16225	-8.84549	PREDICTED: probable LRR receptor-like serine/threonine-protein kinase At5g45840-like	Protein binding	-
A06078	-8.81271	Hypothetical protein CAOG_04169	Calcium ion binding	-
A18279	-8.81046	Extracellular alpha amylase	Catalytic activity	-
A15460	-8.77149	Cof-like hydrolase	Catalytic activity	-
A11633	-8.73358	Hypothetical protein	-	3-oxoadipate enol-lactonase / 4-carboxymuconolactone decarboxylase [EC:3.1.1.24 4.1.1.44]
A08500	-8.70851	Aldo/keto reductase	Oxidoreductase activity	Aryl-alcohol dehydrogenase (NADP+) [EC:1.1.1.91]
A18356	-8.65583	-	-	-
A00068	-8.57112	Zgc:112088 protein, partial	-	-
A17896	-8.50779	Endo-1,4-beta-xylanase	Hydrolase activity, hydrolyzing O-glycosyl compounds	-
A16595	-8.46896	-	Chitin binding	-
A14743	-8.45943	Hypothetical protein BATDEDRAFT_86161	-	-
A12326	-8.45258	1,4-beta-D-glucan-4-glucanohydrolase	Catalytic activity	-
A17207	-8.44156	gCN5-related N-acetyltransferase	N-acetyltransferase activity	-
A12641	-8.38802	Endo-1,3-1,4-beta-glucanase	-	-
A03182	-8.3837	-	-	-
A14789	-8.37359	-	-	-
A04578	-8.36923	Putative polysaccharide lyase family 1	-	-
A03587	-8.36048	-	-	-
A05202	-8.35462	Hypothetical protein BATDEDRAFT_87987	Calcium ion binding	Centrin-2
A03852	-8.35168	Guanine-nucleotide dissociation stimulator CDC25 domain-containing protein	Guanyl-nucleotide exchange factor activity	-
A12524	-8.33539	Proteasome assembly chaperone 2	-	Proteasome assembly chaperone 2
A06325	-8.32942	-	-	-
A15279	-8.30073	Amino acid adenylation domain-containing protein	Catalytic activity	-
A02527	-8.29462	-	Hydrogen ion transporting ATP synthase activity, rotational mechanism	-
A18101	-8.28694	Predicted protein	Protein binding	-
A00813	-8.28232	Hypothetical protein RO3G_16202	Catalytic activity	-
A01551	-8.23522	Predicted protein	Hydrolase activity	-
A07761	-8.22882	-	-	-
A09831	-8.22721	-	-	-
A16165	-8.21755	-	-	-
A01906	-8.21594	Putative uncharacterized protein	-	-
A11665	-8.18653	Alpha-amylase	-	-
A03132	-8.17493	-	-	-
A12964	-8.15144	K7_Rex4p	Nucleic acid binding	-
A00035	-8.13443	Hypothetical protein BATDEDRAFT_86925	DNA-directed RNA polymerase activity	-
A07671	-8.12584	Cellulase Cel48A precursor	Catalytic activity	-
A02194	-8.1224	Purine nucleoside permease	-	-
A16122	-8.09979	-	-	-
A12440	-8.06609	-	-	-
A13352	-8.0625	Putative uncharacterized protein	Magnesium ion binding	-
A18107	-8.05851	Malic enzyme	Nucleotide binding	-
A08366	-8.04985	Amino acid-binding protein	-	Hypothetical protein
A07643	-8.04075	-	-	-
A18168	-8.03526	Ankyrin repeat protein	Protein binding	-
A11055	-8.03342	Hypothetical protein PGTG_18363	Amino acid binding	-
A16751	-8.02237	Vacuolar proteinsorting-associated protein 25, putative	-	ESCRT-II complex subunit VPS25
A01143	-8	Hypothetical protein HMPREF1544_04360	Protein binding	-
A14999	-8	-	-	-
A00224	-7.98868	-	-	-
A01387	-7.98109	-	-	-
A10367	-7.31159	Fatty acid synthase	Fatty acid synthase activity	Fatty acid synthase subunit alpha, fungi type [EC:2.3.1.86]
A12194	-7.26346	-	-	-
A01617	-7.07468	-	-	-
A00774	-7.00802	Endo-1,4-beta-xylanase	Hydrolase activity, hydrolyzing O-glycosyl compounds	-
A00661	-6.97019	Metallo-beta-lactamase domain protein	Hydrolase activity	-
A02030	-6.88412	Hypothetical protein KTR9_4847	-	-
A02912	-6.71836	1,4-beta-D-glucan-4-glucanohydrolase	Catalytic activity	-
A16923	-6.71756	-	-	-
A04484	-6.60443	-	-	-
A07406	-6.60273	Hypothetical protein RO3G_15939	Chitin binding	Glutathione S-transferase [EC:2.5.1.18]
A09857	-6.55832	Phosphomannose isomerase type I	Mannose-6-phosphate isomerase activity	Mannose-6-phosphate isomerase [EC:5.3.1.8]
A13916	-6.52923	Cellulase	-	-
A03809	-6.4949	Alpha-amylase MalS	Starch binding	-
A01159	-6.43672	Hypothetical protein	-	-
A17294	-6.43138	Hypothetical protein BATDEDRAFT_33939, partial	Chitin binding	-
A16824	-6.42715	Hypothetical protein AOL_s00097g268	-	-
A11779	-6.40675	Hypothetical protein BATDEDRAFT_89622	Protein binding	Internalin A
A04318	-6.361	Hypothetical protein BATDEDRAFT_33939, partial	Chitin binding	-
A17802	-6.3581	Cysteine protease	Starch binding	Alpha-amylase [EC:3.2.1.1]
A11382	-6.35098	-	-	-
A17707	-6.32548	Putative cellulase	Protein domain specific binding	Spore coat protein H
A05769	-6.31973	Malic enzyme	Nucleotide binding	Malate dehydrogenase (oxaloacetate-decarboxylating)(NADP+) [EC:1.1.1.40]
A01549	-6.28783	Hypothetical protein BATDEDRAFT_19784	Binding	-
A06181	-6.27935	Lectin	Chitin binding	Glutathione S-transferase [EC:2.5.1.18]
A17677	-6.26485	Dockerin type 1	-	-
A02535	-6.24184	Hypothetical protein BATDEDRAFT_19784	Binding	-
A10245	-6.22616	-	-	-
A09563	-6.18454	Hypothetical protein RO3G_15939	-	-
A15881	-6.17671	Cellulase Cel48A precursor	Catalytic activity	-
A08701	-6.17521	Alpha-amylase	Starch binding	-
A09474	-6.17414	Hypothetical protein	Protein binding	Internalin A
A12262	-6.17368	Extracellular alpha amylase	Catalytic activity	Alpha-amylase [EC:3.2.1.1]
A00663	-6.16829	Alpha-amylase	Starch binding	-
A00385	-6.15048	Hypothetical protein RO3G_11882	-	-
A01039	-6.13703	-	-	-
A10356	-6.13233	Tri m 2 allergen	Serine-type endopeptidase activity	Cerevisin [EC:3.4.21.48]
A03239	-6.11661	Chitin binding protein, partial	Chitin binding	-
A01625	-6.11272	Hypothetical protein BATDEDRAFT_21367	Chitin binding	-
A08700	-6.08939	Alpha-amylase	Starch binding	-
A02918	-6.07935	1,4-beta-D-glucan-4-glucanohydrolase	Protein domain specific binding	-
A16250	-6.06818	Malic enzyme	Nucleotide binding	-
A02695	-6.05772	Hypothetical protein AM1_1973	Protein binding	-
A16618	-6.05638	Rubrerythrin	Iron ion binding	-
A00483	-6.01657	Hypothetical protein BATDEDRAFT_89622	Chitin binding	Chitinase [EC:3.2.1.14]
A14167	-6.00652	Fe-dependent oxidoreductase, alcohol dehydrogenase	Oxidoreductase activity	-
A00779	-6.00615	Carbohydrate-binding module family 18 protein	Chitin binding	-
A14711	-5.97605	-	-	-
A09873	-5.97253	MEMO1 protein	-	-
A10890	-5.96134	-	-	-
A03811	-5.95735	Fe-dependent oxidoreductase, alcohol dehydrogenase	Oxidoreductase activity	-
A04473	-5.92086	General stress protein 14 (GSP14)	Electron carrier activity	-
A09732	-5.90128	-	-	-
A01149	-5.88742	Alpha-amylase precursor	Starch binding	-
A08390	-5.87554	Hypothetical protein TRIADDRAFT_21692	Hydrolase activity, hydrolyzing O-glycosyl compounds	-
A05417	-5.86119	Hypothetical protein alr0124	Chitin binding	-
A11571	-5.85205	Formate C-acetyltransferase	Formate C-acetyltransferase activity	-
A07927	-5.80934	Ankyrin repeat protein	Protein binding	-
A12451	-5.80319	MFS monosaccharide transporter	Transporter activity	MFS transporter, SP family, xylose:H+ symportor
A05952	-5.79796	Sortase and related acyltransferases	N-acetyltransferase activity	Phosphinothricin acetyltransferase [EC:2.3.1.183]
A11983	-5.77805	Methionine adenosyltransferase	-	-
A12024	-5.75489	-	-	-
A02740	-5.74997	Ankyrin repeat domain-containing protein 50	Protein binding	-
A01090	-5.71149	-	-	-
A04020	-5.71039	1,4-beta-D-glucan-cellobiohydrolase	Hydrolase activity, hydrolyzing O-glycosyl compounds	-
A00987	-5.68792	Glutaredoxin	Electron carrier activity	Glutaredoxin 3
A15330	-5.6865	Muscle M-line assembly protein unc-89	-	-
A04597	-5.6865	-	-	-
A14170	-5.67772	PREDICTED: small glutamine-rich tetratricopeptide repeat-containing protein beta	Binding	Stress-induced-phosphoprotein 1
A07926	-5.66144	mFLJ00246 protein	Protein binding	-
A17798	-5.66132	Alpha-amylase precursor	Starch binding	-
A12644	-5.65908	Lichenase	Hydrolase activity, hydrolyzing O-glycosyl compounds	Licheninase [EC:3.2.1.73]
A06547	-5.65515	Glutathione peroxidase	Glutathione peroxidase activity	-
A06196	-5.63969	-	-	-
A02455	-5.63766	PREDICTED: probable alpha-glucosidase Os06g0675700-like	Catalytic activity	-
A02171	-5.63734	Hypothetical protein TRIADDRAFT_53677	Nucleotide binding	-
A09475	-5.62623	Predicted protein	Protein binding	Internalin A
A05948	-5.61817	Hypothetical protein	Catalytic activity	-
A09877	-5.61064	-	-	-
A01647	-5.59308	PREDICTED: LOW QUALITY PROTEIN: zonadhesin	Serine-type endopeptidase activity	Subtilase-type proteinase RRT12 [EC:3.4.21.-]
A00838	-5.5761	Endo-1,4-beta-xylanase	Catalytic activity	Endo-1,4-beta-xylanase [EC:3.2.1.8]
A04434	-5.55917	PREDICTED: acetolactate synthase-like protein	Magnesium ion binding	-
A10789	-5.55815	Serine protease inhibitor	Serine-type endopeptidase inhibitor activity	Serpin B
A12651	-5.53379	Lichenase	Hydrolase activity, hydrolyzing O-glycosyl compounds	Licheninase [EC:3.2.1.73]
A12285	-5.53043	Cell surface glycoprotein (predicted)	Protein binding	Neurofilament heavy polypeptide
A17342	-5.52896	Circumsporozoite protein	Protein binding	-
A15078	-5.52399	-	-	-
A10560	-5.50168	Putative lipoprotein	-	Endoglucanase [EC:3.2.1.4]
A18616	-5.48266	Hypothetical protein BN7_234	Serine-type endopeptidase activity	-
A02040	-5.47678	-	-	-
A11785	-5.47651	Hypothetical protein	Catalytic activity	-
A11086	-5.46125	-	-	-
A15331	-5.45325	ORF24 gene product	-	-
A04366	-5.41243	Glutathione transferase subfamily protein	Protein binding	-
A12535	-5.4075	-	-	-
A06152	-5.3867	-	-	-
A00715	-5.38289	Endoglucanase 45A	Cellulase activity	-
A02435	-5.36215	Hypothetical protein BATDEDRAFT_20546	GTPase activity	-
A18447	-5.34066	Putative VV A32-like packaging ATPase	-	-
A12516	-5.33566	Hypothetical protein AM1_1973	Protein binding	-
A02970	-5.3186	Hypothetical protein	-	Proline iminopeptidase [EC:3.4.11.5]
A01031	-5.31203	Beta-glucosidase	Hydrolase activity, hydrolyzing O-glycosyl compounds	-
A15779	-5.30894	Formate C-acetyltransferase	Formate C-acetyltransferase activity	-
A11997	-5.3067	-	-	-
A08809	-5.30533	-	-	-
A04573	-5.30122	Xylanase B	Catalytic activity	Endo-1,4-beta-xylanase [EC:3.2.1.8]
A02220	-5.29414	Chitinase A1	Catalytic activity	-
A12934	-5.29276	Hypothetical protein RO3G_14405	Magnesium ion binding	-
A04084	-5.29214	Putative uncharacterized protein	Hydrolase activity	-
A00176	-5.28371	BioY protein	-	Putative biotin biosynthesis protein BioY
A01695	-5.26136	-	-	-
A17428	-5.24617	-	-	-
A14320	-5.24022	Alpha-glucosidase	Catalytic activity	-
A03524	-5.22902	Hypothetical protein BATDEDRAFT_89622	Protein binding	Glutathione S-transferase [EC:2.5.1.18]
A08969	-5.21185	-	Nucleotide binding	-
A00675	-5.20763	Hypothetical protein BATDEDRAFT_13456	Catalytic activity	-
A02697	-5.20145	Hypothetical protein BATDEDRAFT_19863	Nucleotidyltransferase activity	-
A04666	-5.19704	Small GTP-binding protein	Protein binding	-
A09811	-5.18576	Peptidase S8, subtilisin-related domain-containing protein	Serine-type endopeptidase activity	-
A04474	-5.17751	NAD(P)H dehydrogenase	Electron carrier activity	-
A00232	-5.17549	Peptidase C14	Cysteine-type endopeptidase activity	-
A00487	-5.16828	Glycosidases	Catalytic activity	-
A04211	-5.16289	Hypothetical protein BATDEDRAFT_13423	Catalytic activity	-
A14322	-5.14473	Calcium/calmodulin-dependent protein kinase type I	ATP binding	-
A16139	-5.14288	-	-	-
A04583	-5.13611	Predicted protein	Ubiquitin-protein ligase activity	Uncharacterized protein
A06887	-5.12297	Trefoil factor	-	-
A02868	-5.11878	Hypothetical protein	-	-
A04992	-5.10903	Hypothetical protein HMPREF1544_10134	DNA binding	-
A11926	-5.10286	Putative cellulase	Catalytic activity	-
A10366	-5.08238	Hypothetical protein RO3G_16171	Nucleotide binding	Fatty acid synthase subunit alpha, fungi type [EC:2.3.1.86]
A18465	-5.07296	-	-	-
A04799	-5.05665	RecName: Full=Alpha-glucosidase; AltName: Full=Maltase; Flags: Precursor	Catalytic activity	-
A09790	-5.05401	Hypothetical protein BATDEDRAFT_12524	Metal ion transmembrane transporter activity	-
A14860	-5.05319	Endo-1,4-beta-xylanase	Hydrolase activity, hydrolyzing O-glycosyl compounds	-
A16259	-5.04829	Glycosyl transferase, family 8 domain-containing protein	Transferase activity, transferring glycosyl groups	-
A07584	-5.02272	-	-	-
A00819	-5.01495	Hypothetical protein BATDEDRAFT_89622	Chitin binding	Chitinase [EC:3.2.1.14]
A07657	-5.00975	NADP(+)-dependent glutamate dehydrogenase	Oxidoreductase activity	Glutamate dehydrogenase (NADP+) [EC:1.4.1.4]
A08604	-5.0045	PREDICTED: skin secretory protein xP2 isoform 2	-	-
A05142	-5.00329	Peroxiredoxin	Glutathione peroxidase activity	-
A14578	-4.99797	Enhancer of yellow 2 transcription factor -like protein	-	Enhancer of yellow 2 transcription factor
A11365	-4.99475	Hypothetical protein BATDEDRAFT_9385	Nucleoside diphosphate kinase activity	Nucleoside-diphosphate kinase [EC:2.7.4.6]
A10002	-4.99319	Hypothetical protein HMPREF1544_06919	Protein binding	SET and MYND domain-containing protein
A06886	-4.99199	Trefoil factor	Catalytic activity	-
A15728	-4.98616	Putative alkaline serine protease alp1 protein	Serine-type endopeptidase activity	Subtilase-type proteinase RRT12 [EC:3.4.21.-]
A13293	-4.97058	Hypothetical protein RO3G_12561	Metalloendopeptidase activity	Endothelin-converting enzyme [EC:3.4.24.71]
A10820	-4.96578	-	-	-
A15615	-4.95242	Pyruvate formate lyase activating enzyme	Catalytic activity	Pyruvate formate lyase activating enzyme [EC:1.97.1.4]
A02867	-4.92961	Hypothetical protein	-	-
A11410	-4.91701	YALI0F01496p	Electron carrier activity	Thioredoxin 1
A02602	-4.90813	Hypothetical protein HMPREF1544_06986	Catalytic activity	-
A00694	-4.9035	Hypothetical protein HMPREF1544_01467	Catalytic activity	Glucose-6-phosphate 1-epimerase [EC:5.1.3.15]
A10625	-4.89575	Hypothetical protein H072_3750	Acetyl-CoA:L-glutamate N-acetyltransferase activity	-
A17151	-4.88726	Arsenic efflux pump protein	Arsenite transmembrane transporter activity	-
A05633	-4.8866	Hypothetical protein BATDEDRAFT_12524	Metal ion transmembrane transporter activity	-
A07478	-4.88538	PREDICTED: probable alpha-glucosidase Os06g0675700-like	Catalytic activity	-
A11085	-4.88226	Unnamed protein product	-	-
A11354	-4.87578	-	-	-
A07135	-4.86435	Hypothetical protein	-	-
A16979	-4.85152	Membrane protein	-	-
A05219	-4.84348	Beta-glucosidase	-	-
A09359	-4.84118	Keratin-associated protein 5-4	Chitin binding	Tenascin
A09523	-4.83789	Hypothetical protein BATDEDRAFT_84861	GTPase activity	-
A00229	-4.83784	Hypothetical protein SCHCODRAFT_67867	Cysteine-type endopeptidase activity	-
A10958	-4.83356	Hypothetical protein RO3G_12561	Metalloendopeptidase activity	Endothelin-converting enzyme [EC:3.4.24.71]
A16716	-4.8283	Putative wd repeat protein	-	-
A10401	-4.82448	Leucine rich repeat protein	Protein binding	Internalin A
A18557	-4.82254	Hypothetical protein BATDEDRAFT_33948	Chitin binding	-
A03644	-4.80555	Aldo/keto reductase diketogulonate reductase	Oxidoreductase activity	-
A05155	-4.80229	Carbohydrate-binding module family 1 protein	Hydrolase activity, hydrolyzing O-glycosyl compounds	-
A00569	-4.79874	-	-	-
A14626	-4.79459	-	-	-
A08955	-4.78148	-	-	-
A09455	-4.76584	Phosphoserine aminotransferase isoform 1	Catalytic activity	Phosphoserine aminotransferase [EC:2.6.1.52]
A17212	-4.76205	Related to apoptotic cell death regulator DAD1	-	-
A11239	-4.75731	-	-	-
A01731	-4.75576	PREDICTED: ATP-binding cassette sub-family A member 5-like	Nucleotide binding	ATP-binding cassette, subfamily A (ABC1), member 5
A00163	-4.74418	Basic chitinase	Chitin binding	-
A09126	-4.73644	Heat shock protein 60	ATP binding	Chaperonin GroEL
A11268	-4.73587	Hypothetical protein	-	-
A10626	-4.73489	Pyruvate formate lyase	Formate C-acetyltransferase activity	-
A11108	-4.73465	Aconitate hydratase	Aconitate hydratase activity	Aconitate hydratase 1 [EC:4.2.1.3]
A09380	-4.73427	Hypothetical protein CHLNCDRAFT_30311	Catalytic activity	Thiamine biosynthesis ThiH
A06680	-4.72795	Hypothetical protein	-	Membrane protease subunit HflC [EC:3.4.-.-]
A04092	-4.70978	Small nuclear ribonucleoprotein D3	-	-
A12782	-4.70904	-	-	-
A01648	-4.70302	Hypothetical protein BATDEDRAFT_21367	Chitin binding	Glutathione S-transferase [EC:2.5.1.18]
A08192	-4.69786	-	Chemokine activity	-
A12489	-4.69651	-	-	-
A01160	-4.69373	Hypothetical protein	-	-
A10794	-4.68624	Hypothetical protein RO3G_04359	Protein binding	DnaJ homolog subfamily A member 5
A18120	-4.68117	Dihydroxy-acid dehydratase	Catalytic activity	Dihydroxy-acid dehydratase [EC:4.2.1.9]
A02950	-4.67709	Saccharopine dehydrogenase	Nucleotide binding	-
A06900	-4.6664	Radical SAM domain containing protein	Catalytic activity	-
A11853	-4.66197	Hypothetical protein	Catalytic activity	Alpha-amylase [EC:3.2.1.1]
A02870	-4.65169	Alpha-amylase precursor	Starch binding	-
A00904	-4.65102	-	-	-
A08995	-4.65048	Erv1/Alr domain-containing protein	Thiol oxidase activity	CCR4-NOT transcription complex subunit 1
A03581	-4.65025	Hypothetical protein RO3G_04738	Catalytic activity	-
A02422	-4.644	-	-	-
A10644	-4.63944	Isoprenylcysteine carboxyl methyltransferase	-	-
A04188	-4.63452	Hypothetical protein BATDEDRAFT_91682	Protein binding	-
A04154	-4.63084	Hypothetical protein BATDEDRAFT_18836	Nucleotide binding	-
A05932	-4.62764	-	-	-
A07848	-4.62651	PREDICTED: serine/threonine-protein phosphatase 6 regulatory ankyrin repeat subunit B-like	Protein binding	-
A05944	-4.62409	Hypothetical protein HMPREF1544_04015	Binding	-
A00506	-4.60608	Glutamate dehydrogenase (NADP+)	Oxidoreductase activity	-
A14020	-4.6031	UMP-CMP kinase domain-containing protein	ATP binding	UMP-CMP kinase [EC:2.7.4.- 2.7.4.14]
A13130	-4.59674	Cellulase Cel48A precursor	Catalytic activity	-
A16948	-4.59023	Pc22g24690	-	-
A12890	-4.5878	Hypothetical protein	-	-
A11469	-4.58505	-	-	-
A10971	-4.57273	PREDICTED: glutathione S-transferase-like isoform 1	Protein binding	Glutathione S-transferase [EC:2.5.1.18]
A13294	-4.56569	Neprilysin-like protein	Metalloendopeptidase activity	Membrane metallo-endopeptidase-like 1
A12437	-4.56512	Pyruvate formate lyase	Catalytic activity	Formate C-acetyltransferase [EC:2.3.1.54]
A02285	-4.56408	Hypothetical protein	-	-
A00528	-4.5614	Predicted protein	-	-
A18533	-4.56074	Hypothetical protein HMPREF1544_03610	ATP binding	TNF receptor-associated protein 1
A09198	-4.54705	-	-	-
A04296	-4.53557	Cip2	Hydrolase activity, hydrolyzing O-glycosyl compounds	Endo-1,4-beta-xylanase [EC:3.2.1.8]
A18169	-4.53231	-	-	-
A15075	-4.53157	Acetyl-CoA hydrolase	Catalytic activity	Acetyl-CoA hydrolase [EC:3.1.2.1]
A11257	-4.52718	Hypothetical protein, partial	-	-
A07729	-4.52181	Hypothetical protein BATDEDRAFT_9753	Nucleotide binding	ATP-binding cassette, subfamily C (CFTR/MRP), member 3
A11502	-4.5179	Pyruvate kinase, partial	Magnesium ion binding	Pyruvate kinase [EC:2.7.1.40]
A10627	-4.5149	Pyruvate formate lyase	Catalytic activity	-
A07768	-4.51238	-	-	-
A06241	-4.51146	Quinolinate synthetase A protein, putative	Quinolinate synthetase A activity	Quinolinate synthase [EC:2.5.1.72]
A00322	-4.50914	Hypothetical protein AOL_s00006g39	-	-
A09020	-4.49931	Hypothetical protein BATDEDRAFT_34365	Catalytic activity	Chitin deacetylase [EC:3.5.1.41]
A06049	-4.4945	-	-	-
A00742	-4.49298	Transaldolase	Catalytic activity	-
A10561	-4.47546	Hypothetical protein KNAG_0E04210	Nucleotide binding	Glutamate dehydrogenase (NADP+) [EC:1.4.1.4]
A16610	-4.46228	Ankyrin repeat protein	Protein binding	-
A15396	-4.46066	Hypothetical protein Aasi_1435	Protein binding	-
A14666	-4.4245	Hypothetical protein PFL1_02866	Carbohydrate binding	-
A18190	-4.42218	CAAX amino terminal protease	-	-
A12321	-4.41781	Hypothetical protein	Nucleotide binding	D-lactate dehydrogenase [EC:1.1.1.28]
A03192	-4.40124	Predicted protein	Protein binding	-
A10282	-4.39867	Hypothetical protein HMPREF1544_05070	Protein prenyltransferase activity	Protein farnesyltransferase/geranylgeranyltransferase type-1 subunit alpha [EC:2.5.1.58 2.5.1.59]
A00228	-4.39605	Hypothetical protein SCHCODRAFT_67867	Cysteine-type endopeptidase activity	-
A04316	-4.38846	Esterase	Hydrolase activity	-
A14360	-4.37882	Leucine rich repeat protein	Protein binding	-
A12537	-4.37039	-	-	-
A14848	-4.36438	Glycogen	Glycogen (starch) synthase activity	-
A18195	-4.36399	-	-	-
A07164	-4.36051	-	-	-
A12567	-4.35417	U-box domain containing protein	Protein binding	Uncharacterized protein
A11858	-4.34399	Hypothetical protein HMPREF1544_06986	Catalytic activity	-
A07340	-4.34219	PEBP family protein	-	-
A14774	-4.34202	Hexokinase 3	Hexokinase activity	-
A17737	-4.3416	Heat shock protein Hsp20	-	-
A06185	-4.33457	Hypothetical protein BATDEDRAFT_89622	Chitin binding	Glutathione S-transferase [EC:2.5.1.18]
A06611	-4.3318	Glyceraldehyde-3-phosphate dehydrogenase, partial	Nucleotide binding	-
A12226	-4.32614	Hypothetical protein BATDEDRAFT_18836	Nucleotide binding	-
A05016	-4.32227	Hexokinase 3	Hexokinase activity	-
A12565	-4.31393	U-box domain containing protein	Protein binding	-
A15039	-4.30978	Pyruvate formate lyase	Catalytic activity	-
A15065	-4.309	Hypothetical protein BATDEDRAFT_34613	-	Lectin, mannose-binding 1
A13180	-4.30413	Fumarylacetoacetate hydrolase family protein, putative	Catalytic activity	-
A01147	-4.29418	-	-	-
A16237	-4.29339	Glucoamylase 1	Hydrolase activity, hydrolyzing O-glycosyl compounds	-
A01347	-4.29106	2,5-diketo-D-gluconic acid reductase	Oxidoreductase activity	-
A10142	-4.28826	Putative cellulase	Catalytic activity	-
A01629	-4.28798	Hypothetical protein STEHIDRAFT_107620	-	-
A15888	-4.28507	-	-	-
A08448	-4.27712	Hypothetical protein	-	Hypothetical protein
A16217	-4.27359	Beta-glucosidase	Hydrolase activity, hydrolyzing O-glycosyl compounds	Beta-glucosidase [EC:3.2.1.21]
A13098	-4.26856	Hypothetical protein HMPREF1544_02686	Catalytic activity	-
A18643	-4.26117	Hypothetical protein	Nucleotide binding	Malate dehydrogenase (oxaloacetate-decarboxylating)(NADP+) [EC:1.1.1.40]
A16533	-4.26088	Polysaccharide deacetylase family protein	Catalytic activity	-
A12678	-4.26019	Diphosphate--fructose-6-phosphate 1-phosphotransferase	6-phosphofructokinase activity	Pyrophosphate--fructose-6-phosphate 1-phosphotransferase [EC:2.7.1.90]
A10660	-4.2546	Hypothetical protein	-	Proline iminopeptidase [EC:3.4.11.5]
A11630	-4.2487	Hypothetical protein	-	Microsomal epoxide hydrolase [EC:3.3.2.9]
A07149	-4.24153	Succinyl-CoA synthetase alpha subunit	Nucleotide binding	-
A06255	-4.2364	Hypothetical protein BATDEDRAFT_23260	Transferase activity, transferring glycosyl groups	-
A12568	-4.23483	Predicted protein	Protein binding	Uncharacterized protein
A08948	-4.22858	Unnamed protein product	Hydrolase activity	N-acyl-phosphatidylethanolamine-hydrolyzing phospholipase D [EC:3.1.4.-]
A05445	-4.22086	Hypothetical protein BATDEDRAFT_17667	Phosphorylase activity	Starch phosphorylase [EC:2.4.1.1]
A12983	-4.21348	-	-	-
A00190	-4.2113	sSS sodium solute transporter superfamily	Transporter activity	-
A00772	-4.20636	Alcohol dehydrogenase	Nucleotide binding	-
A06756	-4.20533	Tri m 2 allergen	Serine-type endopeptidase activity	-
A00081	-4.19306	Malate dehydrogenase	Nucleotide binding	Malate dehydrogenase [EC:1.1.1.37]
A14391	-4.18601	Hypothetical protein LEMA_P123290.1	Chitin binding	-
A15571	-4.1854	Hypothetical protein BATDEDRAFT_28764	-	-
A12171	-4.18523	-	-	-
A14145	-4.18477	Peptidase C14	Cysteine-type endopeptidase activity	-
A02782	-4.18042	Glucose-6-phosphate isomerase 2	Glucose-6-phosphate isomerase activity	-
A11497	-4.17882	Pyruvate kinase	Magnesium ion binding	Pyruvate kinase [EC:2.7.1.40]
A17245	-4.17128	Transaldolase	Catalytic activity	-
A06824	-4.1708	Hypothetical protein MGG_10431	Chitin binding	Glutathione S-transferase [EC:2.5.1.18]
A07618	-4.16864	Succinyl-CoA synthetase, beta subunit	Catalytic activity	Succinyl-CoA synthetase beta subunit [EC:6.2.1.4 6.2.1.5]
A07911	-4.1663	-	Protein binding	-
A12564	-4.16597	Predicted protein	-	-
A05309	-4.16549	Hypothetical protein BATDEDRAFT_34770	Catalytic activity	-
A13890	-4.1602	Para-nitrobenzyl esterase, a/b hydrolase	-	-
A16785	-4.15665	Hypothetical protein AURDEDRAFT_169317	Hydrolase activity, hydrolyzing O-glycosyl compounds	-
A02580	-4.15399	-	-	-
A12742	-4.15186	Conserved domain protein	Zinc ion binding	-
A16775	-4.14666	Predicted protein	Nucleotide binding	-
A09060	-4.14296	Hypothetical protein BATDEDRAFT_87040	Hydrolase activity, acting on acid anhydrides, catalyzing transmembrane movement of substances	V-type H+-transporting ATPase subunit C [EC:3.6.3.14]
A17683	-4.13731	-	Transmembrane transporter activity	-
A01816	-4.13465	-	-	-
A11496	-4.13327	Pyruvate kinase	Magnesium ion binding	Pyruvate kinase [EC:2.7.1.40]
A06023	-4.12632	-	-	-
A13419	-4.11454	GTP-binding protein YchF	GTP binding	-
A17704	-4.10121	Ethanolamine-phosphate cytidylyltransferase	Catalytic activity	-
A04887	-4.09126	Tryptophan synthase subunit alpha	Catalytic activity	Tryptophan synthase beta chain [EC:4.2.1.20]
A18271	-4.07996	-	-	-
A02035	-4.07173	Glyceraldehyde-3-phosphate dehydrogenase, partial	Nucleotide binding	-
A00686	-4.06825	S-adenosylmethionine synthase	Methionine adenosyltransferase activity	S-adenosylmethionine synthetase [EC:2.5.1.6]
A06416	-4.06468	PREDICTED: F-box/LRR-repeat protein 7-like	Protein binding	F-box and leucine-rich repeat protein 7
A06806	-4.06344	Succinyl-CoA synthase alpha subunit	Nucleotide binding	-
A03400	-4.0619	Predicted protein	-	-
A09125	-4.05417	Phosphoglycerate kinase	Phosphoglycerate kinase activity	Phosphoglycerate kinase [EC:2.7.2.3]
A00983	-4.05386	-	-	-
A17203	-4.03383	-	-	-
A18628	-4.03011	Hypothetical protein HMPREF1544_08777	Protein binding	Phosphatidylserine decarboxylase [EC:4.1.1.65]
A07468	-4.0292	Homocitrate synthase	Catalytic activity	-
A16187	-4.02175	Hypothetical protein BATDEDRAFT_16919	Rab GDP-dissociation inhibitor activity	-
A05435	-4.02147	Hypothetical protein BATDEDRAFT_90846	ATP binding	V-type H+-transporting ATPase subunit A [EC:3.6.3.14]
A09429	-4.01996	Immunoglobulin G-binding protein A, partial	-	-
A11631	-4.01511	Hypothetical protein	-	Protein RutD
A15291	-4.01181	-	-	-
A05801	-4.0086	N-acetyltransferase GCN5	N-acetyltransferase activity	-
A11177	-4.00421	-	-	-
A13772	-4.00181	-	-	-
A10754	-4.00119	-	-	-
A11918	-4.00088	Methyltransferase type 11	-	-
A10352	-3.99006	-	-	-
A15869	-3.98892	Hypothetical protein BATDEDRAFT_31463	NADH dehydrogenase (ubiquinone) activity	NADH dehydrogenase (ubiquinone) flavoprotein 1 [EC:1.6.5.3 1.6.99.3]
A06598	-3.9884	Hypothetical protein THITE_2113948	-	-
A13851	-3.9814	Mercuric reductase	Oxidoreductase activity	Dihydrolipoamide dehydrogenase [EC:1.8.1.4]
A02497	-3.97991	YALI0F17820p	Nucleotide binding	Glutamate dehydrogenase (NADP+) [EC:1.4.1.4]
A09173	-3.97589	Hypothetical protein BATDEDRAFT_88511	-	Kinesin family member C1
A09955	-3.97479	Hypothetical protein HMPREF1544_01790	-	-
A03482	-3.9725	Pyruvate formate lyase	Catalytic activity	-
A00545	-3.96945	Hypothetical protein	-	Signal peptidase I [EC:3.4.21.89]
A07603	-3.96333	Pyruvate formate lyase	Catalytic activity	-
A05015	-3.96094	Hypothetical protein	Peptidyl-prolyl cis-trans isomerase activity	-
A14997	-3.95951	Beta-glucosidase	Catalytic activity	-
A01027	-3.95711	Hypothetical protein HMPREF1544_05890	Protein binding	-
A03583	-3.95105	Hypothetical protein LEMA_P123290.1	Chitin binding	-
A00510	-3.94959	Pyruvate formate lyase	Formate C-acetyltransferase activity	-
A12688	-3.94449	Proteasomal ubiquitin receptor ADRM1	-	-
A06745	-3.93956	Hypothetical protein HMPREF1544_09858	Catalytic activity	-
A18316	-3.93877	L-aspartate oxidase	L-aspartate oxidase activity	-
A11669	-3.93424	Probable formate transporter	Transporter activity	Formate transporter
A03483	-3.93174	Pyruvate formate lyase	Catalytic activity	-
A11498	-3.92005	Pyruvate kinase	Magnesium ion binding	Pyruvate kinase [EC:2.7.1.40]
A13589	-3.91698	Hypothetical protein BATDEDRAFT_87570	-	-
A08616	-3.91645	PREDICTED: la-related protein 1	-	-
A01884	-3.91347	FAD binding domain-containing protein	Succinate dehydrogenase activity	-
A04288	-3.90979	-	-	-
A17585	-3.90899	20S proteasome subunit beta 7	Endopeptidase activity	20S proteasome subunit beta 7 [EC:3.4.25.1]
A14171	-3.90823	-	-	-
A12824	-3.90792	PREDICTED: phosphatidate phosphatase PPAPDC1B-like	Catalytic activity	Phosphatidate phosphatase [EC:3.1.3.4]
A01528	-3.90722	Conserved hypothetical protein	-	-
A15970	-3.9037	Hypothetical protein BATDEDRAFT_36186	RNA binding	-
A10482	-3.90226	Aconitate hydratase, partial	Aconitate hydratase activity	Aconitate hydratase 1 [EC:4.2.1.3]
A03769	-3.89327	-	-	-
A10380	-3.8891	V-type proton ATPase subunit B	ATP binding	V-type H+-transporting ATPase subunit B [EC:3.6.3.14]
A04304	-3.88873	Endo-1,4-beta-xylanase	Hydrolase activity, hydrolyzing O-glycosyl compounds	-
A12837	-3.87641	-	Endopeptidase inhibitor activity	-
A08990	-3.85423	Hypothetical protein BATDEDRAFT_30482	Threonine-type endopeptidase activity	20S proteasome subunit beta 4 [EC:3.4.25.1]
A02852	-3.84583	Hypothetical protein MYCFIDRAFT_72290	Nucleotide binding	Pyrroline-5-carboxylate reductase [EC:1.5.1.2]
A06576	-3.8419	-	-	-
A11917	-3.84063	Methyltransferase type 11	Methyltransferase activity	-
A00925	-3.84031	m18 family aminopeptidase	Aminopeptidase activity	Aminopeptidase [EC:3.4.11.-]
A02467	-3.83726	Glutamate dehydrogenase (NADP+)	Oxidoreductase activity	-
A06105	-3.83713	-	-	-
A08214	-3.8348	YALI0F17820p	Nucleotide binding	-
A03058	-3.82877	Hypothetical protein BATDEDRAFT_33973	Nucleotide binding	-
A00787	-3.81958	Zinc finger domain containing protein	Nucleic acid binding	-
A11980	-3.808	Cellulosomal serpin precursor	Serine-type endopeptidase inhibitor activity	-
A12133	-3.80708	Hypothetical protein BATDEDRAFT_33939, partial	Lysozyme activity	Glutathione S-transferase [EC:2.5.1.18]
A10396	-3.80631	PREDICTED: type I inositol 1,4,5-trisphosphate 5-phosphatase 12-like	-	Phosphatidylinositol-bisphosphatase [EC:3.1.3.36]
A05857	-3.80405	Hypothetical protein CAOG_02944	Protein binding	-
A17999	-3.80196	-	-	-
A07617	-3.79791	-	-	-
A05027	-3.79305	Hypothetical protein HMPREF1544_03569	Protein kinase binding	-
A10132	-3.79116	Hypothetical protein SCHCODRAFT_14902	-	-
A16914	-3.78034	PREDICTED: ATP-binding cassette sub-family A member 5-like	ATP binding	-
A16115	-3.77137	-	-	-
A03018	-3.76713	Alpha-Beta tubulin	GTPase activity	-
A15762	-3.75836	3-isopropylmalate dehydrogenase	Magnesium ion binding	-
A14820	-3.74951	Hypothetical protein O9G_005338	-	-
A18619	-3.74831	CBS domain containing protein	Catalytic activity	-
A12739	-3.74774	Hypothetical protein Rumal_0768	Hydrolase activity, hydrolyzing O-glycosyl compounds	-
A14476	-3.74689	DNA-directed RNA polymerase subunit, putative	DNA binding	-
A18259	-3.74605	Hypothetical protein BATDEDRAFT_89306	Protein binding	-
A11760	-3.74052	LrgB-domain-containing protein	-	Holin-like protein LrgB
A04270	-3.73881	Alpha amylase catalytic domain protein	-	-
A02396	-3.7361	Hypothetical protein BATDEDRAFT_19038	Catalytic activity	-
A04584	-3.73492	Predicted protein	-	-
A03110	-3.73454	YALI0F01496p	Electron carrier activity	-
A11930	-3.72963	Hypothetical protein BATDEDRAFT_29573	Magnesium ion binding	Ribose-phosphate pyrophosphokinase [EC:2.7.6.1]
A14323	-3.72726	Pkinase-domain-containing protein	Protein kinase activity	-
A06740	-3.72717	Adenylosuccinate lyase	Catalytic activity	Adenylosuccinate lyase [EC:4.3.2.2]
A06612	-3.72426	Glycoside hydrolase	Catalytic activity	-
A07661	-3.72425	Hypothetical protein BATDEDRAFT_2475, partial	Protein kinase activity	-
A17418	-3.72425	Hypothetical protein BATDEDRAFT_2475, partial	Protein kinase activity	-
A13986	-3.7183	Xylose isomerase	Xylose isomerase activity	-
A04152	-3.7057	Hypothetical protein BATDEDRAFT_22495	-	-
A07672	-3.70108	Putative cellulase	Catalytic activity	-
A11084	-3.69914	Xylose isomerase	Xylose isomerase activity	Xylose isomerase [EC:5.3.1.5]
A09019	-3.69026	Hypothetical protein RO3G_16202	Catalytic activity	Chitin deacetylase [EC:3.5.1.41]
A03057	-3.68844	Pyruvate formate lyase	Catalytic activity	-
A13754	-3.68812	Hypothetical protein BATDEDRAFT_19191	-	-
A04692	-3.68582	D-3 phosphoglycerate dehydrogenase	Nucleotide binding	-
A13155	-3.68535	Hypothetical protein BATDEDRAFT_90367	GMP synthase (glutamine-hydrolyzing) activity	GMP synthase (glutamine-hydrolysing) [EC:6.3.5.2]
A08181	-3.68278	Beta-actin	ATP binding	-
A03398	-3.68205	Cellulase Cel48A precursor	Catalytic activity	-
A09465	-3.6814	Synaptobrevin	-	Vesicle-associated membrane protein 4
A03989	-3.67739	Formate C-acetyltransferase	Catalytic activity	-
A08560	-3.67511	Asparagine synthase	Nucleotide binding	Aspartate--ammonia ligase [EC:6.3.1.1]
A11877	-3.67437	Hypothetical protein BRAFLDRAFT_129784	DNA binding	Histone H2A
A13993	-3.67399	Hypothetical protein	-	-
A06003	-3.67316	Enolase	Magnesium ion binding	Enolase [EC:4.2.1.11]
A17039	-3.65484	Hypothetical protein RO3G_16457	Nucleotide binding	-
A17981	-3.65423	ATP-dependent RNA helicase uap56	Nucleic acid binding	-
A17020	-3.64816	Glutathione amide-dependent peroxidase	Electron carrier activity	-
A13999	-3.6473	Phosphoribosylaminoimidazole-succinocarboxamide synthase	Phosphoribosylaminoimidazolesuccinocarboxamide synthase activity	Phosphoribosylaminoimidazole-succinocarboxamide synthase [EC:6.3.2.6]
A00636	-3.64083	Hypothetical protein BATDEDRAFT_18836	Nucleotide binding	-
A17494	-3.63989	Hypothetical protein BATDEDRAFT_30462	RNA binding	-
A16490	-3.63786	Hypothetical protein BATDEDRAFT_13762	Catalytic activity	Pantoate--beta-alanine ligase [EC:6.3.2.1]
A02878	-3.63696	C2 (Calcium/lipid-binding, CaLB)	Protein binding	-
A16103	-3.63472	Hsp71-like protein	ATP binding	Heat shock 70kDa protein 1/8
A00985	-3.62668	Glutaredoxin-C2	Electron carrier activity	Glutaredoxin 3
A05412	-3.62507	Ubiquitin	Protein binding	Large subunit ribosomal protein L40e
A04466	-3.62373	Hypothetical protein BATDEDRAFT_33281	Oxidoreductase activity	-
A09319	-3.61811	Hypothetical protein RO3G_05883	Translation initiation factor activity	Translation initiation factor 3 subunit C
A15060	-3.61763	ATP phosphoribosyltransferase	Magnesium ion binding	ATP phosphoribosyltransferase [EC:2.4.2.17]
A08336	-3.61622	Proteasome subunit alpha type-4	Endopeptidase activity	20S proteasome subunit alpha 3 [EC:3.4.25.1]
A16915	-3.61424	-	-	-
A09505	-3.61421	Pyruvate formate lyase	Catalytic activity	-
A09182	-3.61065	Hypothetical protein BATDEDRAFT_34030	tRNA binding	Glutamyl-tRNA synthetase [EC:6.1.1.17]
A01076	-3.60691	Hypothetical protein BATDEDRAFT_16919	Rab GDP-dissociation inhibitor activity	-
A02898	-3.6068	Hypothetical protein BATDEDRAFT_19000	Phosphoribosylaminoimidazole carboxylase activity	Phosphoribosylaminoimidazole carboxylase [EC:4.1.1.21]
A11395	-3.6016	Proteasome subunit beta type-7	Endopeptidase activity	20S proteasome subunit beta 2 [EC:3.4.25.1]
A12216	-3.59917	Hypothetical protein BATDEDRAFT_91903	Citrate (Si)-synthase activity	Citrate synthase [EC:2.3.3.1]
A10029	-3.59782	Hypothetical protein BATDEDRAFT_87745	Catalytic activity	Threonine aldolase [EC:4.1.2.5]
A17791	-3.59631	Hypothetical protein	Phosphatidate cytidylyltransferase activity	-
A07027	-3.5888	V-type H+-transporting ATPase subunit I	Hydrogen ion transmembrane transporter activity	-
A05200	-3.58672	Hypothetical protein HMPREF1544_01225	Catalytic activity	Phosphoribosylamine--glycine ligase / phosphoribosylformylglycinamidine cyclo-ligase [EC:6.3.4.13 6.3.3.1]
A01833	-3.58664	Isocitrate dehydrogenase	Magnesium ion binding	-
A03481	-3.57734	Formate C-acetyltransferase	Formate C-acetyltransferase activity	-
A15646	-3.57468	Endoribonuclease L-PSP	-	-
A10898	-3.57064	Hsp71-like protein	ATP binding	Heat shock 70kDa protein 1/8
A08556	-3.56653	-	-	-
A09555	-3.54993	Endo-1,4-beta-xylanase	Catalytic activity	Endo-1,4-beta-xylanase [EC:3.2.1.8]
A00682	-3.54761	Hypothetical protein Aasi_1435	Protein binding	-
A10646	-3.54739	Membrane protease subunit, stomatin/prohibitin	-	-
A01384	-3.54174	-	-	-
A09802	-3.53931	Glutaredoxin-1	Electron carrier activity	-
A17180	-3.53413	Hypothetical protein RO3G_16975	Nucleotide binding	Tryptophanyl-tRNA synthetase [EC:6.1.1.2]
A13770	-3.5319	GK20873	-	-
A06650	-3.53115	Hypothetical protein BATDEDRAFT_35114	Protein binding	-
A09489	-3.5285	-	-	-
A12969	-3.52814	Hypothetical protein HMPREF1544_07920	Binding	-
A10249	-3.52694	Hypothetical protein BATDEDRAFT_92113	ATPase activity, coupled to transmembrane movement of substances	V-type H+-transporting ATPase subunit D [EC:3.6.3.14]
A14963	-3.52454	Hypothetical protein Isop_3000	-	-
A02690	-3.52073	Glutathione S-transferase family member gst-6	Protein binding	-
A10726	-3.51866	Hypothetical protein HMPREF1544_09829	Nucleotide binding	N-acetyl-gamma-glutamyl-phosphate reductase / acetylglutamate kinase [EC:1.2.1.38 2.7.2.8]
A07492	-3.51397	Hypothetical protein BATDEDRAFT_15498	Catalytic activity	Purine-nucleoside phosphorylase [EC:2.4.2.1]
A12093	-3.5135	-	-	-
A08994	-3.50551	Hypothetical protein BATDEDRAFT_33174	Voltage-gated anion channel activity	Voltage-dependent anion channel protein 2
A07192	-3.50247	C-1-tetrahydrofolate synthase, cytoplasmic	Nucleotide binding	Methylenetetrahydrofolate dehydrogenase (NADP+) / methenyltetrahydrofolate cyclohydrolase / formyltetrahydrofolate synthetase [EC:1.5.1.5 3.5.4.9 6.3.4.3]
A12744	-3.49544	Short-chain dehydrogenase	Nucleotide binding	Gluconate 5-dehydrogenase [EC:1.1.1.69]
A03082	-3.49274	Hypothetical protein BATDEDRAFT_16038	Glutamine-fructose-6-phosphate transaminase (isomerizing) activity	-
A17865	-3.49196	Hypothetical protein AGABI1DRAFT_130896	Serine-type endopeptidase activity	-
A15158	-3.4901	-	-	-
A12490	-3.4874	-	-	-
A17438	-3.48221	Hypothetical protein HMPREF1544_11747	-	-
A08472	-3.48219	Unnamed protein product	-	Membrane protease subunit HflC [EC:3.4.-.-]
A05898	-3.47781	Phosphoenolpyruvate carboxykinase	Phosphoenolpyruvate carboxykinase activity	-
A10573	-3.47748	Hypothetical protein BATDEDRAFT_87408	Hydrogen ion transporting ATP synthase activity, rotational mechanism	V-type H+-transporting ATPase subunit F [EC:3.6.3.14]
A16037	-3.47168	Hypothetical protein	Protein domain specific binding	-
A09269	-3.47097	-	-	-
A13771	-3.46785	Carbohydrate-binding module family 12 protein	-	-
A01608	-3.46698	-	-	-
A08926	-3.46637	Hypothetical protein SDRG_09345	-	-
A12191	-3.46096	Hypothetical protein TBLA_0D03630	N-methyltransferase activity	Methylene-fatty-acyl-phospholipid synthase [EC:2.1.1.16]
A08909	-3.46042	Beta-glucosidase	Catalytic activity	-
A08837	-3.45873	Co-chaperone GrpE	Adenyl-nucleotide exchange factor activity	Molecular chaperone GrpE
A16112	-3.45043	Hypothetical protein RO3G_01814	Structural molecule activity	-
A03578	-3.45028	Translation initiation factor 2 subunit 2	Translation initiation factor activity	-
A01701	-3.44819	Hypothetical protein BATDEDRAFT_18898	Adenosylhomocysteinase activity	-
A05136	-3.44759	Maltose O-acetyltransferase	Acetyltransferase activity	Maltose O-acetyltransferase [EC:2.3.1.79]
A17701	-3.44585	Hypothetical protein RO3G_02885	Acetolactate synthase activity	-
A13717	-3.44563	Cellulase	Protein domain specific binding	-
A04714	-3.44532	PREDICTED: ankyrin repeat domain-containing protein 50-like	Protein binding	-
A10039	-3.44455	Hypothetical protein BATDEDRAFT_37522	Binding	V-type H+-transporting ATPase 54 kD subunit [EC:3.6.3.14]
A08257	-3.44192	-	-	-
A10968	-3.43477	-	-	-
A15398	-3.43273	Piso0_005888	-	-
A13886	-3.43145	Hypothetical protein A11Q_322	-	-
A01285	-3.43106	Hypothetical protein TRIADDRAFT_25311	Cation transmembrane transporter activity	-
A11714	-3.41517	Hypothetical protein	Protein binding	Ankyrin repeat-rich membrane spanning protein
A15991	-3.40864	Hypothetical protein BATDEDRAFT_18481	Catalytic activity	Glycine hydroxymethyltransferase [EC:2.1.2.1]
A08991	-3.40696	Unnamed protein product	Endopeptidase activity	20S proteasome subunit beta 4 [EC:3.4.25.1]
A15681	-3.40375	Hypothetical protein BATDEDRAFT_17631	Catalytic activity	-
A02186	-3.39901	Beta-xylosidase/alpha-L-arabinfuranosidase	Hydrolase activity, hydrolyzing O-glycosyl compounds	-
A14134	-3.39798	DUF567 domain protein	-	-
A10281	-3.39262	Hypothetical protein HMPREF1544_07868	Nucleotide binding	Translation initiation factor 3 subunit G
A00972	-3.38495	Alanyl-tRNA synthetase	Nucleotide binding	-
A05741	-3.38191	Hypothetical protein HMPREF1544_01568	SNAP receptor activity	Syntaxin 7
A10209	-3.3797	Pyruvate formate lyase	Catalytic activity	Formate C-acetyltransferase [EC:2.3.1.54]
A00736	-3.37222	Hypothetical protein PHYSODRAFT_530496	Nucleotide binding	-
A05467	-3.3711	-	-	-
A15702	-3.36638	14-3-3 protein	Protein domain specific binding	-
A11130	-3.36622	Hypothetical protein BATDEDRAFT_35761	Protein binding	26S proteasome regulatory subunit N8
A00486	-3.3618	Glycosidases	Catalytic activity	-
A08107	-3.36134	Hypothetical protein BATDEDRAFT_19117	Nucleotide binding	Ubiquitin-activating enzyme E1 [EC:6.3.2.19]
A15691	-3.35935	RNA-directed DNA polymerase, Non LTR Retrotransposon	RNA binding	-
A08263	-3.35868	PREDICTED: putative ankyrin repeat protein L93-like	-	-
A02210	-3.35624	Peptidase C69	Dipeptidase activity	-
A00812	-3.35485	Hypothetical protein RO3G_16202	Catalytic activity	-
A06700	-3.35468	Hypothetical protein BATDEDRAFT_20015	Catalytic activity	Mitochondrial processing peptidase [EC:3.4.24.64]
A00643	-3.34934	Hypothetical protein PFL1_05109	Protein kinase activity	-
A07337	-3.34404	-	-	-
A10722	-3.33967	-	-	-
A18528	-3.33722	Hypothetical protein BATDEDRAFT_10541, partial	-	DNA-directed RNA polymerases I, II, and III subunit RPABC3
A03821	-3.33596	Hypothetical protein HMPREF1544_11393	Hydrolase activity, acting on acid anhydrides, catalyzing transmembrane movement of substances	V-type H+-transporting ATPase subunit G [EC:3.6.3.14]
A10624	-3.33381	Hypothetical protein RO3G_03247	Protein binding	Translation initiation factor 3 subunit F
A05893	-3.33274	Aldose reductase, putative	Oxidoreductase activity	-
A02761	-3.33067	Hypothetical protein BATDEDRAFT_19136	Nucleotide binding	Phenylalanyl-tRNA synthetase beta chain [EC:6.1.1.20]
A07712	-3.32868	Hypothetical protein	-	-
A12595	-3.31902	Ribose-5-phosphate isomerase B, putative	Ribose-5-phosphate isomerase activity	Ribose 5-phosphate isomerase B [EC:5.3.1.6]
A17409	-3.31265	D-xylulokinase	Xylulokinase activity	-
A13773	-3.31158	Hypothetical protein FG09205.1	-	-
A10130	-3.30546	PREDICTED: proliferation-associated protein 2G4-like	-	Metalloprotease ARX1 [EC:3.-.-.-]
A15989	-3.29922	Proteasome subunit alpha type-6	Endopeptidase activity	20S proteasome subunit alpha 1 [EC:3.4.25.1]
A08859	-3.29817	Calcium-binding protein 39	Binding	Calcium binding protein 39
A01943	-3.29265	Hypothetical protein TRIADDRAFT_57010	Protein binding	-
A03174	-3.2826	-	-	-
A03786	-3.28177	Hypothetical protein RO3G_10750	-	-
A17902	-3.28166	Iron hydrogenase precursor	Iron ion binding	NADH dehydrogenase I subunit G [EC:1.6.5.3]
A18001	-3.27583	-	-	-
A00493	-3.2735	Hypothetical protein BATDEDRAFT_18583	Hydrolase activity	-
A04249	-3.2726	Ketol-acid reductoisomerase	Nucleotide binding	Ketol-acid reductoisomerase [EC:1.1.1.86]
A16949	-3.27067	-	-	-
A11922	-3.26837	-	-	-
A03509	-3.26509	Leucine rich repeat protein	Protein binding	-
A14232	-3.26478	Predicted protein	-	-
A11224	-3.263	Hypothetical protein AOL_s00007g33	Hydrolase activity	-
A17408	-3.26206	Xylose isomerase	Xylose isomerase activity	-
A16323	-3.25657	Protease HtpX-like protein	Metalloendopeptidase activity	Heat shock protein HtpX [EC:3.4.24.-]
A04651	-3.25277	Hypothetical protein PGTG_13383	Nucleotide binding	-
A01896	-3.25186	Hypothetical protein BATDEDRAFT_84512	Adenosylmethionine decarboxylase activity	S-adenosylmethionine decarboxylase [EC:4.1.1.50]
A12425	-3.24963	Hypothetical protein BATDEDRAFT_16919	Rab GDP-dissociation inhibitor activity	-
A01478	-3.24882	Aldehyde-alcohol dehydrogenase, partial	Oxidoreductase activity	-
A00986	-3.24598	Hypothetical protein PHYSODRAFT_348647	Electron carrier activity	Glutaredoxin 3
A11083	-3.24412	Xylose isomerase	Xylose isomerase activity	Xylose isomerase [EC:5.3.1.5]
A04979	-3.24408	Hypothetical protein bpr_I2329	-	-
A13675	-3.24402	Pyruvate formate lyase	Catalytic activity	-
A04827	-3.23894	Hypothetical protein BATDEDRAFT_86773	Nucleotide binding	Multifunctional beta-oxidation protein [EC:4.2.1.- 1.1.1.-]
A17752	-3.2387	Hypothetical protein BATDEDRAFT_28556	Protein binding	-
A13388	-3.23516	ATP synthase (E/31 kDa) subunit	Proton-transporting ATPase activity, rotational mechanism	-
A07866	-3.22872	Homoaconitate hydratase	Homoaconitate hydratase activity	Homoaconitate hydratase [EC:4.2.1.36]
A06685	-3.22811	Probable endo-1,4-beta-xylanase B precursor	Hydrolase activity, hydrolyzing O-glycosyl compounds	-
A17424	-3.22723	Hypothetical protein	-	-
A04792	-3.22408	Putative cellulase	Hydrolase activity, hydrolyzing O-glycosyl compounds	-
A06425	-3.21142	Hypothetical protein SERLA73DRAFT_185646	Endopeptidase activity	20S proteasome subunit alpha 4 [EC:3.4.25.1]
A07353	-3.21083	Hypothetical protein PFL1_01719	-	Protein disulfide-isomerase A1 [EC:5.3.4.1]
A01490	-3.20597	Hypothetical protein BATDEDRAFT_34365	Chitin binding	Glutathione S-transferase [EC:2.5.1.18]
A14324	-3.20267	Pkinase-domain-containing protein	Protein kinase activity	-
A02319	-3.19933	Nicotinate-nucleotide pyrophosphorylase	Catalytic activity	Nicotinate-nucleotide pyrophosphorylase (carboxylating) [EC:2.4.2.19]
A16435	-3.19923	Component of cytosolic 80S ribosome and 60S large subunit	Protein binding	-
A06909	-3.19788	Hypothetical protein RO3G_02363	Threonine-type endopeptidase activity	-
A03658	-3.19345	Hypothetical protein BATDEDRAFT_20617	GTPase activity	-
A00447	-3.18994	Abortive infection protein	-	-
A05990	-3.18464	Aspartate-semialdehyde dehydrogenase	Nucleotide binding	Aspartate-semialdehyde dehydrogenase [EC:1.2.1.11]
A06954	-3.18093	Orotate phosphoribosyltransferase	Orotate phosphoribosyltransferase activity	Orotate phosphoribosyltransferase [EC:2.4.2.10]
A05442	-3.17677	Hypothetical protein PIIN_01866	-	Laminin, alpha 1/2
A08982	-3.16949	Hypothetical protein BATDEDRAFT_20090	Transporter activity	MFS transporter, PHS family, inorganic phosphate transporter
A03410	-3.16869	Putative uncharacterized protein	Catalytic activity	-
A15606	-3.16839	Putative sugar/Na+(H+) simporter	-	-
A14365	-3.16756	Hypothetical protein BATDEDRAFT_85134	Acid-amino acid ligase activity	-
A16810	-3.16423	Hypothetical protein	-	-
A02362	-3.16275	NAD(P)H-dependent nitro/flavin reductase	Oxidoreductase activity	-
A16395	-3.15958	Stress protein	-	-
A07953	-3.15864	-	-	-
A08089	-3.15652	Hypothetical protein BATDEDRAFT_20750	Calcium ion binding	Calreticulin
A00114	-3.1564	-	-	-
A14577	-3.15072	Hypothetical protein BATDEDRAFT_12346	Catalytic activity	IMP dehydrogenase [EC:1.1.1.205]
A10579	-3.1459	Hypothetical protein E5Q_00301	-	Actin related protein 2/3 complex, subunit 2
A15444	-3.14002	Profilin conserved site domain-containing protein	Actin binding	-
A13628	-3.13694	Unnamed protein product	Translation elongation factor activity	-
A11193	-3.1363	-	-	-
A04913	-3.1351	Nucleosome assembly protein	-	Nucleosome assembly protein 1-like 1
A16113	-3.13476	Hypothetical protein KAFR_0A05490	Phosphotransferase activity, for other substituted phosphate groups	-
A07735	-3.13416	Glucan endo-1,3-beta-D-glucosidase	Hydrolase activity, hydrolyzing O-glycosyl compounds	-
A03205	-3.1334	-	-	-
A12004	-3.12991	-	-	-
A17238	-3.12352	Hypothetical protein HMPREF1544_06130	Nucleotide binding	-
A15565	-3.12265	RecName: Full=Peptidyl-prolyl cis-trans isomerase B; Short=PPIase B; AltName: Full=Cyclophilin B; AltName: Full=Rotamase B; Flags: Precursor	Peptidyl-prolyl cis-trans isomerase activity	-
A18597	-3.11948	Hypothetical protein GMDG_04187	-	-
A11409	-3.11685	YALI0F01496p	Electron carrier activity	Thioredoxin 1
A06112	-3.11602	Hypothetical protein HMPREF1544_00949	-	-
A11866	-3.10979	Hsp71-like protein	ATP binding	Heat shock 70kDa protein 1/8
A00405	-3.10631	Adenosine kinase b	Adenosine kinase activity	Adenosine kinase [EC:2.7.1.20]
A05995	-3.09169	Hypothetical protein DACRYDRAFT_19346	GTPase activity	Translation initiation factor 5B
A10796	-3.08814	Calmodulin	Calcium ion binding	Calmodulin
A09525	-3.08776	Endoglucanase 45A	Cellulase activity	-
A05082	-3.08183	Hypothetical protein BATDEDRAFT_34367	Nucleotide binding	-
A16818	-3.08138	Hypothetical protein DAPPUDRAFT_105663	-	-
A17907	-3.08128	Galactoside O-acetyltransferase	Transferase activity	-
A07613	-3.08061	Hypothetical protein BATDEDRAFT_9716	Argininosuccinate synthase activity	Argininosuccinate synthase [EC:6.3.4.5]
A12584	-3.08004	-	-	-
A00167	-3.07246	Hypothetical protein BATDEDRAFT_33421	GTPase activity	Translation initiation factor 2 subunit 3
A14163	-3.07049	Hypothetical protein BATDEDRAFT_2915	Protein kinase activity	Mitogen-activated protein kinase kinase [EC:2.7.12.2]
A09564	-3.0658	Hypothetical protein RO3G_15939	-	-
A00321	-3.06421	Hypothetical protein BATDEDRAFT_88542	Endopeptidase activity	-
A06460	-3.06121	Hypothetical protein RO3G_16202	Catalytic activity	-
A18638	-3.06114	Calcium-translocating P-type ATPase, PMCA-type	Nucleotide binding	Ca2+-transporting ATPase [EC:3.6.3.8]
A13156	-3.0607	Ribose-phosphate pyrophosphokinase 3	Magnesium ion binding	Ribose-phosphate pyrophosphokinase [EC:2.7.6.1]
A06226	-3.05861	Hypothetical protein HMPREF1544_03519	Hydrolase activity	-
A09421	-3.05251	Tautomerase/MIF	-	Phenylpyruvate tautomerase [EC:5.3.2.1]
A13133	-3.05124	PREDICTED: 26S protease regulatory subunit 8-like	Nucleotide binding	-
A11611	-3.05106	Hypothetical protein BATDEDRAFT_10743	Catalytic activity	Branched-chain amino acid aminotransferase [EC:2.6.1.42]
A02325	-3.0342	PREDICTED: ATP-binding cassette sub-family A member 6 isoform 2	Nucleotide binding	ATP-binding cassette, subfamily A (ABC1), member 8
A04054	-3.03073	-	-	-
A04370	-3.02997	Serine/threonine-dual specificity kinase domain-containing protein	-	-
A06292	-3.02992	Histone H2B.1	DNA binding	-
A00344	-3.02496	Hypothetical protein SELMODRAFT_116581	Nucleotide binding	-
A16532	-3.02061	Hypothetical protein BATDEDRAFT_12346	Catalytic activity	-
A00653	-3.01729	Hypothetical protein BATDEDRAFT_34365	Chitin binding	-
A02900	-3.01314	Hypothetical protein BATDEDRAFT_15609	Nucleotide binding	Leucyl-tRNA synthetase [EC:6.1.1.4]
A17669	-3.00757	-	-	-
A18488	-3.006	Hypothetical protein Ahos_1098	-	-
A09736	-2.99627	Hypothetical protein HMPREF1544_10378	Catalytic activity	-
A13977	-2.98737	-	-	-
A07269	-2.98664	Hypothetical protein BAUCODRAFT_33198	Guanylate kinase activity	Guanylate kinase [EC:2.7.4.8]
A16270	-2.98018	Hypothetical protein CNBC7180	-	-
A09943	-2.97849	Calmodulin variant 1	Calcium ion binding	Calmodulin
A06925	-2.97431	26S protease regulatory subunit 7	Nucleotide binding	26S proteasome regulatory subunit T1
A05885	-2.97426	Hypothetical protein CLUG_03310	RNA binding	-
A03549	-2.97175	-	-	-
A00882	-2.96811	Arf GTPase activating protein domain-containing protein	Protein binding	-
A15725	-2.96331	Hypothetical protein BATDEDRAFT_18299	Nucleotide binding	Threonyl-tRNA synthetase [EC:6.1.1.3]
A17745	-2.96273	Hypothetical protein HMPREF1544_07919	Phosphotransferase activity, for other substituted phosphate groups	-
A08716	-2.96125	-	-	-
A14861	-2.95679	-	-	-
A12089	-2.95576	Sugar transporter	-	-
A11267	-2.94624	Hypothetical protein Shel_16430	-	-
A08322	-2.9439	Translation initiation factor 2 subunit 2	Translation initiation factor activity	-
A07983	-2.93844	Nuclear localization sequence-binding protein	Nucleotide binding	Nucleolin
A17270	-2.93791	Bifunctional purine biosynthesis protein ade10	Catalytic activity	Phosphoribosylaminoimidazolecarboxamide formyltransferase / IMP cyclohydrolase [EC:2.1.2.3 3.5.4.10]
A07859	-2.93261	Hypothetical protein BATDEDRAFT_88511	-	Kinesin family member C1
A03467	-2.92856	Hypothetical protein HMPREF1544_07523	-	Protein ERP2
A10361	-2.92623	Hypothetical protein RO3G_11882	-	-
A02410	-2.92435	Hypothetical protein RO3G_16291	-	-
A11215	-2.90934	Phosphoglycerate mutase	Catalytic activity	Phosphoglycerate mutase [EC:5.4.2.1]
A04248	-2.90519	Ketol-acid reductoisomerase	Ketol-acid reductoisomerase activity	Ketol-acid reductoisomerase [EC:1.1.1.86]
A08890	-2.90401	-	-	-
A00652	-2.9031	Polysaccharide deacetylase	Protein binding	-
A11522	-2.89904	Expansin module family protein	Protein domain specific binding	-
A06791	-2.89896	Putative cellulase	Hydrolase activity, hydrolyzing O-glycosyl compounds	-
A02910	-2.89865	Hypothetical protein BATDEDRAFT_84510	Nucleotide binding	Arginyl-tRNA synthetase [EC:6.1.1.19]
A09375	-2.89674	CAMK/CAMKL/PASK protein kinase	Protein kinase activity	-
A13054	-2.89349	Hypothetical protein BATDEDRAFT_37053	Protein binding	-
A10110	-2.89319	-	Protein domain specific binding	-
A04289	-2.89266	-	-	-
A09015	-2.89034	-	-	-
A03636	-2.88748	Hypothetical protein BATDEDRAFT_20268	Actin binding	-
A12924	-2.88329	EF-hand	Calcium ion binding	-
A04195	-2.88027	Polysaccharide deacetylase	Catalytic activity	-
A07113	-2.87311	Hypothetical protein AOL_s00007g474	Structural molecule activity	-
A18642	-2.87276	Ankyrin repeat domain-containing protein 50	Protein binding	-
A09343	-2.86922	-	-	-
A02944	-2.86475	Hypothetical protein RO3G_08265	-	-
A12318	-2.86259	Hypothetical protein	Protein domain specific binding	-
A09118	-2.86165	Hypothetical protein BATDEDRAFT_37534	GTPase activity	Rab family, other
A17193	-2.85936	Hypothetical protein BATDEDRAFT_8861	P-P-bond-hydrolysis-driven protein transmembrane transporter activity	-
A04685	-2.85775	Proteasome subunit alpha type-2	Endopeptidase activity	-
A00345	-2.85603	-	-	-
A04978	-2.85531	Hypothetical protein CIY_24220	Ureidoglycolate hydrolase activity	-
A02934	-2.85221	UV excision repair protein RAD23	Damaged DNA binding	-
A06874	-2.852	PREDICTED: adenylyltransferase and sulfurtransferase MOCS3	-	-
A14919	-2.84538	Adenylate kinase	Adenylate kinase activity	-
A15391	-2.84395	Hypothetical protein BATDEDRAFT_31537, partial	Protein binding	-
A05688	-2.84189	Hypothetical protein	-	-
A06456	-2.83886	Hypothetical protein Fisuc_1948	Protein domain specific binding	-
A07529	-2.82656	Hypothetical protein HMPREF1544_03479	-	-
A10397	-2.81742	DUF1900 domain-containing protein	Protein binding	Coronin-1C
A11466	-2.81219	Ankyrin repeat protein	Protein binding	Ribonuclease L
A14516	-2.80782	Hypothetical protein BATDEDRAFT_16026	Nucleic acid binding	-
A07751	-2.80674	-	-	-
A08873	-2.79026	Putative cellulase	Catalytic activity	Endoglucanase [EC:3.2.1.4]
A16279	-2.78554	Hypothetical protein BATDEDRAFT_89245	-	-
A03473	-2.78342	Hypothetical protein RO3G_11637	tRNA binding	Phenylalanyl-tRNA synthetase alpha chain [EC:6.1.1.20]
A01602	-2.76303	Membrane protease subunit, stomatin/prohibitin	-	-
A11731	-2.75034	Actin-like protein ARPC3	-	Actin related protein 2/3 complex, subunit 4
A02511	-2.74745	Thioredoxin	Calcium ion binding	-
A01843	-2.74711	Sugar transporter	-	-
A18560	-2.74588	Alpha-N-arabinofuranosidase	Hydrolase activity, hydrolyzing O-glycosyl compounds	-
A10771	-2.73991	-	Nucleotide binding	-
A09017	-2.73678	Hypothetical protein RO3G_16202	Catalytic activity	Chitin deacetylase [EC:3.5.1.41]
A07379	-2.73259	Malate dehydrogenase	Nucleotide binding	Malate dehydrogenase [EC:1.1.1.37]
A09945	-2.72622	Hypothetical protein HMPREF1544_10184	Nucleotide binding	Polyadenylate-binding protein
A05158	-2.72535	Triose phosphate isomerase	Catalytic activity	Triosephosphate isomerase (TIM) [EC:5.3.1.1]
A06531	-2.72211	Hypothetical protein RO3G_14141	Rho GDP-dissociation inhibitor activity	Rho GDP-dissociation inhibitor
A01466	-2.71771	Hypothetical protein BATDEDRAFT_88099	-	-
A13416	-2.71643	Hypothetical protein PGTG_13383	Nucleotide binding	-
A11465	-2.70058	-	-	-
A11794	-2.69716	Histone H3	DNA binding	Histone H3
A16737	-2.69654	-	-	-
A02393	-2.69635	Acetylxylan esterase, partial	Hydrolase activity	-
A10743	-2.69366	U4/U6 small nuclear ribonucleoprotein SNU13	RNA binding	U4/U6 small nuclear ribonucleoprotein SNU13
A07318	-2.69187	RecName: Full=Orotidine 5'-phosphate decarboxylase; AltName: Full=OMP decarboxylase; Short=OMPDCase; Short=OMPdecase; AltName: Full=Uridine 5'-monophosphate synthase; Short=UMP synthase	Catalytic activity	-
A11125	-2.68955	Hypothetical protein PHACADRAFT_259678	-	-
A02696	-2.68624	Beta-actin	ATP binding	-
A17582	-2.68161	20S proteasome subunit beta 6	Endopeptidase activity	20S proteasome subunit beta 6 [EC:3.4.25.1]
A11210	-2.67636	Hypothetical protein HMPREF1544_01558	-	-
A14223	-2.66238	AaceriAFR356Cp	RNA binding	-
A09043	-2.6585	-	-	-
A14756	-2.64933	-	-	-
A05258	-2.64679	Endo-1,4-beta-xylanase A	Hydrolase activity, hydrolyzing O-glycosyl compounds	Endo-1,4-beta-xylanase [EC:3.2.1.8]
A14824	-2.64417	Endoglucanase	Catalytic activity	-
A04813	-2.64386	Mannanase ManA	Protein domain specific binding	-
A15236	-2.63979	Superoxide dismutase	Superoxide dismutase activity	Superoxide dismutase, Fe-Mn family [EC:1.15.1.1]
A11132	-2.63688	-	-	-
A06073	-2.63497	Cellobiohydrolase II-like cellulase CelI	Hydrolase activity, hydrolyzing O-glycosyl compounds	-
A14873	-2.62879	Conserved hypothetical protein	Catalytic activity	-
A07720	-2.62079	Putative cellulase	Hydrolase activity, hydrolyzing O-glycosyl compounds	-
A11218	-2.61743	Putative cellulase	Catalytic activity	Endoglucanase [EC:3.2.1.4]
A17394	-2.6108	Protein phosphatase 2A	Hydrolase activity	-
A13643	-2.60685	-	-	-
A00740	-2.59763	Heat shock protein 70 precursor	ATP binding	-
A07976	-2.59325	Glutamate-5-semialdehyde dehydrogenase	Glutamate-5-semialdehyde dehydrogenase activity	Glutamate-5-semialdehyde dehydrogenase [EC:1.2.1.41]
A09235	-2.58688	-	-	-
A08618	-2.58571	-	-	-
A09264	-2.58384	Hypothetical protein SCHCODRAFT_80045	N-acetyltransferase activity	-
A16747	-2.58234	Hypothetical protein RO3G_16202	Catalytic activity	Chitin deacetylase [EC:3.5.1.41]
A02640	-2.58095	Hypothetical protein BATDEDRAFT_34968	Magnesium ion binding	Inorganic pyrophosphatase [EC:3.6.1.1]
A07534	-2.57708	Hypothetical protein RO3G_11022	Magnesium ion binding	-
A11795	-2.57607	Histone H4	DNA binding	Histone H4
A12494	-2.56729	-	-	-
A03677	-2.5656	Cellulase Cel9A precursor	Catalytic activity	-
A15884	-2.56325	Carbamoyl-phosphate synthase, small subunit	-	-
A08996	-2.55417	Hypothetical protein RO3G_17081	Actin binding	Actin related protein 2/3 complex, subunit 1A/1B
A10617	-2.55195	Hypothetical protein CNBC7180	-	-
A06179	-2.54463	-	-	-
A09880	-2.53768	Serine/threonine protein phosphatase PP1	Hydrolase activity	Protein phosphatase 1, catalytic subunit [EC:3.1.3.16]
A10885	-2.51406	Hypothetical protein BATDEDRAFT_20161	Actin binding	Cofilin
A10202	-2.50514	Hypothetical protein GUITHDRAFT_103748	-	-
A17277	-2.47741	ADP-ribosylation factor	GTP binding	Arf/Sar family, other
A13485	-2.47003	Cellulase Cel9A precursor	Protein domain specific binding	-
A18182	-2.45917	Glycoside hydrolase family 5	Catalytic activity	-
A13497	-2.41001	O-acetylhomoserine aminocarboxypropyltransferase/cysteine synthase	Catalytic activity	-
A02471	-2.39569	Beta-xylosidase/endoglucanase	Protein domain specific binding	-
A04022	-2.36573	Hypothetical protein RO3G_11361	-	-
A04344	-2.36403	Hypothetical protein RO3G_15464	Zinc ion binding	-
A17127	-2.35868	Hypothetical protein RO3G_09285	Serine-type carboxypeptidase activity	-
A10536	-2.35207	-	-	-
A01653	-2.34138	Putative uncharacterized protein	Oxidoreductase activity	-
A17087	-2.33946	Homocitrate synthase	Catalytic activity	-
A10386	-2.326	-	-	-
A01742	-2.32499	Dockerin type I repeat./Ricin-type beta-trefoil lectin domain	-	-
A11754	-2.30949	Hypothetical protein BATDEDRAFT_84444	Catalytic activity	Dihydroorotate dehydrogenase (fumarate) [EC:1.3.98.1]
A08025	-2.30002	Hypothetical protein RO3G_03850	-	-
A11214	-2.27658	-	-	-
A08815	-2.27387	Protein disulfide-isomerase	Electron carrier activity	Protein disulfide-isomerase A6 [EC:5.3.4.1]
A11482	-2.26421	Hypothetical protein RO3G_15091	Hydrogen ion transmembrane transporter activity	V-type H+-transporting ATPase 16kDa proteolipid subunit [EC:3.6.3.14]
A16802	-2.25286	Putative cellulase	Catalytic activity	-
A13738	-2.23998	Spermidine synthase	Catalytic activity	-
A07119	-2.18725	Hexokinase 4	Hexokinase activity	-
A03573	-2.17553	ADP/ATP carrier	Transporter activity	-
A00174	-2.13884	Putative cellulase	Catalytic activity	Cellulose 1,4-beta-cellobiosidase [EC:3.2.1.91]
A01314	2.23218	Chain A, Structure And Function Of A Ubiquitin Binding Site Within The Catalytic Domain Of A Hect Ubiquitin Ligase	Protein binding	-
A11699	2.2924	-	Protein kinase activity	-
A11434	2.4079	Cytidine deaminase	Catalytic activity	Cytidine deaminase [EC:3.5.4.5]
A14471	2.44895	Arabinose-proton symporter	ATP binding	-
A08833	2.45142	Hypothetical protein AGABI2DRAFT_201549	Thiamine diphosphokinase activity	Thiamine pyrophosphokinase [EC:2.7.6.2]
A03465	2.46632	Hypothetical protein PTT_19504	-	MFS transporter, LAT3 family, solute carrier family 43, member 3
A06162	2.46905	-	-	-
A01696	2.60366	Transporter, major facilitator superfamily superfamily protein	Transporter activity	-
A18112	2.63394	FMN-binding protein	-	-
A14627	2.75709	-	-	-
A00394	2.9721	-	-	-
A11516	2.99426	Hypothetical protein	Nucleic acid binding	Midasin
A07679	3.00984	Hypothetical protein	-	tRNA (guanine-N1-)-methyltransferase [EC:2.1.1.31]
A10657	3.01883	Endo-1,4-beta-xylanase	Hydrolase activity, hydrolyzing O-glycosyl compounds	-
A17884	3.0698	Protein ZK637.14	Protein binding	-
A11508	3.19601	-	-	-
A13785	3.4214	Chain A, Structure And Function Of A Ubiquitin Binding Site Within The Catalytic Domain Of A Hect Ubiquitin Ligase	Protein binding	-
A01277	3.57787	-	-	-
A05272	3.68327	Transporter, major facilitator superfamily superfamily protein	Transporter activity	-
A03642	3.82715	Myosin-10	-	-
A05758	3.84803	-	-	-
A14273	4.06582	Hypothetical protein	Protein binding	-
A11128	4.45499	PREDICTED: LOW QUALITY PROTEIN: mucin-19	-	-
A16863	4.53063	Hypothetical protein	Catalytic activity	-
A00390	4.5435	Hypothetical protein BATDEDRAFT_90358	-	-
A07449	4.65571	-	-	-
A00754	5.11169	Hypothetical protein RO3G_08029	-	-
A07814	5.14447	Hypothetical protein	-	-
A15088	5.4063	-	-	-
A11711	5.43509	-	-	-
A06153	5.44507	Hypothetical protein EGK_15752	-	Proprotein convertase subtilisin/kexin type 5 [EC:3.4.21.-]
A03103	5.45457	Heme lyase (mitochondrion)	-	-
A10600	5.49765	Circumsporozoite protein	-	-
A15083	5.73948	Hypothetical protein Haur_1598	Chitin binding	-
A00753	6.34591	Hypothetical protein RO3G_04189	-	-
A03105	6.62831	Circumsporozoite protein	-	-
A12240	6.73225	Conserved hypothetical protein	-	-
A01657	6.93528	Hypothetical protein PFL1_01810	GTPase activity	Translation initiation factor 2 subunit 3
A00782	7.09459	Hypothetical protein Haur_1598	Chitin binding	-
A15439	7.43532	PREDICTED: CCR4-NOT transcription complex subunit 1-like	-	-
A08101	8.06429	Lectin-B	Chitin binding	-
A15892	10.3619	Hypothetical protein Haur_1598	-	-

## Sheet: Supplementary Table 8
Supplementary Table 8 Differentially expressed proteins at the late-growth stage (P value < 0.05 and fold change > ±1.2 in at least two iTRAQ sets)
GeneID	Ratio	Uniprot_Swissprot	NCBInr	KEGG
A04324	0.482667	60S ribosomal protein L27a (Fragment)	Putative 60S ribosomal protein L27A	Chromosome transmission fidelity protein 1 [EC:3.6.4.13]
A12393	0.512667	-	Hypothetical protein	-
A09942	0.555333	Peptidyl-prolyl cis-trans isomerase pin1	Peptidyl-prolyl cis/trans isomerase-like protein	Peptidyl-prolyl cis-trans isomerase NIMA-interacting 1 [EC:5.2.1.8]
A08105	0.555667	Endochitinase A	Hypothetical protein	Glutathione S-transferase [EC:2.5.1.18]
A18633	0.571667	-	-	-
A04839	0.580333	Adenine phosphoribosyltransferase	Adenine phosphoribosyltransferase	Adenine phosphoribosyltransferase [EC:2.4.2.7]
A07269	0.583	Guanylate kinase	Guanylate kinase	Guanylate kinase [EC:2.7.4.8]
A06738	0.591	Histidinol-phosphate aminotransferase	Hypothetical protein BATDEDRAFT_3086, partial	Histidinol-phosphate aminotransferase [EC:2.6.1.9]
A12012	0.599333	-	-	-
A15624	0.606333	-	-	-
A14577	0.627	Putative inosine-5'-monophosphate dehydrogenase-like protein YAR075W	Hypothetical protein BATDEDRAFT_12346	IMP dehydrogenase [EC:1.1.1.205]
A17143	0.640667	Co-chaperone protein HscB	DnaJ domain-containing protein	Molecular chaperone HscB
A17573	0.641667	MOB kinase activator 1A	Hypothetical protein BATDEDRAFT_30301	Maintenance of ploidy protein MOB1 (MPS1 binder 1)
A15401	0.643667	Protein KBP homolog	-	-
A05755	0.644333	-	-	-
A08560	0.644667	Aspartate--ammonia ligase	Asparagine synthetase A (asnA)	-
A15702	0.648	14-3-3 protein homolog	Hypothetical protein BATDEDRAFT_20242	Tyrosine 3-monooxygenase/tryptophan 5-monooxygenase activation protein
A01537	0.648333	-	-	-
A13468	0.649	60S ribosomal protein L38	60S ribosomal protein L38	Large subunit ribosomal protein L38e
A13181	0.669	Sex muscle abnormal protein 5	Hypothetical protein STEHIDRAFT_94632	-
A12226	0.669	Inositol-3-phosphate synthase	Putative INO1	Myo-inositol-1-phosphate synthase [EC:5.5.1.4]
A13138	0.672333	-	-	-
A07534	0.676667	Probable homoisocitrate dehydrogenase	Hypothetical protein RO3G_11022	Homoisocitrate dehydrogenase [EC:1.1.1.87]
A16490	0.677	Pantothenate synthetase	Pantoate-beta-alanine ligase	Pantoate--beta-alanine ligase [EC:6.3.2.1]
A07057	0.677667	-	-	-
A15731	0.682333	Eukaryotic translation initiation factor 4 gamma 1	Hypothetical protein AOL_s00097g638	Translation initiation factor 4G
A13640	0.683	Leucine carboxyl methyltransferase 1	Hypothetical protein BATDEDRAFT_86819	-
A04369	0.684	Myosin light chain kinase A	Hypothetical protein BATDEDRAFT_20919	Ca2+/calmodulin-dependent protein kinase [EC:2.7.11.17]
A08578	0.685	Protein translation factor sui1	Hypothetical protein BATDEDRAFT_84447	Translation initiation factor 1
A01141	0.685667	DCN1-like protein 1	Hypothetical protein RO3G_00990	-
A15444	0.686	Profilin-2	Hypothetical protein BATDEDRAFT_14302	Profilin
A14258	0.688333	Anthranilate synthase component 2 (Fragment)	Hypothetical protein RO3G_08776	Anthranilate synthase / indole-3-glycerol phosphate synthase / phosphoribosylanthranilate isomerase [EC:4.1.3.27 4.1.1.48 5.3.1.24]
A03675	0.689333	Acetylornithine aminotransferase	Hypothetical protein RO3G_02451	Acetylornithine aminotransferase [EC:2.6.1.11]
A07468	0.692667	Homocitrate synthase, mitochondrial	Homocitrate synthase	Homocitrate synthase [EC:2.3.3.14]
A16532	0.693667	Inosine-5'-monophosphate dehydrogenase 1	Hypothetical protein BATDEDRAFT_12346	IMP dehydrogenase [EC:1.1.1.205]
A03482	0.694333	Autonomous glycyl radical cofactor	Formate C-acetyltransferase	-
A09802	0.694667	Glutaredoxin	Glutaredoxin-1	Glutaredoxin 3
A03840	0.696	Ankyrin repeat domain-containing protein 13B	Hypothetical protein FOXB_10717	-
A12733	0.701	General stress protein 14	Putative nad h quinone family protein	-
A04792	0.701	Mannan endo-1,4-beta-mannosidase B	Putative cellulase	-
A11753	0.701667	Transportin-2	Transportin-1 AltName: Full=Importin beta-2	Importin subunit beta-1
A18258	0.701667	Breakpoint cluster region protein	Beta-chimaerin	RalA-binding protein 1
A04366	0.702333	Glutathione S-transferase A	Hypothetical protein TRIVIDRAFT_91258	Glutathione S-transferase [EC:2.5.1.18]
A12425	0.703333	Probable secretory pathway GDP dissociation inhibitor 1	Hypothetical protein BATDEDRAFT_16919	-
A14751	0.703333	Exportin-1	Hypothetical protein MPER_14239	Exportin-1
A10243	0.705667	Tryptophan synthase beta chain 1	Tryptophan synthase involved in tryptophan biosynthesis	Tryptophan synthase beta chain [EC:4.2.1.20]
A05160	0.710667	Uncharacterized ARM-like repeat-containing protein C1703.03c	Armadillo repeat protein	-
A14402	0.712333	Mannose-6-phosphate isomerase	Phosphomannose isomerase type I	Mannose-6-phosphate isomerase [EC:5.3.1.8]
A08009	0.713333	Rap1 GTPase-GDP dissociation stimulator 1	Uncharacterized protein	-
A02144	0.717	Protein bcp1	Conserved hypothetical protein	Protein BCP1
A16514	0.720667	Protein TANC2	Hypothetical protein TRIATDRAFT_190696	ATP-dependent RNA helicase DDX5/DBP2 [EC:3.6.4.13]
A03776	0.722667	-	Nitroreductase	-
A15615	0.724	Pyruvate formate-lyase-activating enzyme	Pyruvate formate lyase activating enzyme	-
A10626	0.724333	Formate acetyltransferase	Pyruvate formate lyase	-
A00466	0.724667	NEDD8-activating enzyme E1 catalytic subunit	Hypothetical protein MPER_03226	Ubiquitin-activating enzyme E1 C [EC:6.3.2.19]
A10115	0.725333	Protein YSC84	DUF500-domain-containing protein	-
A02871	0.725667	Glyoxal reductase	Hypothetical protein TRIVIDRAFT_64039	Alcohol dehydrogenase (NADP+) [EC:1.1.1.2]
A10002	0.727333	SET and MYND domain-containing protein DDB_G0273589	Hypothetical protein RO3G_14193	SET and MYND domain-containing protein
A03466	0.727333	Diphthine synthase	Diphthine synthase	Diphthine synthase [EC:2.1.1.98]
A02569	0.727333	Exportin-T	Hypothetical protein RO3G_08438	Exportin-T
A18120	0.727667	Dihydroxy-acid dehydratase	Hypothetical protein MYCTH_2301934	Dihydroxy-acid dehydratase [EC:4.2.1.9]
A11928	0.729333	Importin-9	Hypothetical protein RO3G_03508	-
A01347	0.729667	Uncharacterized oxidoreductase YtbE	Hypothetical protein	Alcohol dehydrogenase (NADP+) [EC:1.1.1.2]
A11611	0.735	Branched-chain-amino-acid aminotransferase	Hypothetical protein BATDEDRAFT_10743	Branched-chain amino acid aminotransferase [EC:2.6.1.42]
A13510	0.735667	Cysteine--tRNA ligase	Hypothetical protein SCRG_03371	Cysteinyl-tRNA synthetase [EC:6.1.1.16]
A17477	0.738333	Sec14 cytosolic factor	Hypothetical protein MELLADRAFT_49171	-
A00985	0.741333	Glutaredoxin-C1	Hypothetical protein AOL_s00006g226	Glutaredoxin 3
A13186	0.742	Adenylosuccinate synthetase	Hypothetical protein BATDEDRAFT_32828	Adenylosuccinate synthase [EC:6.3.4.4]
A00648	0.744667	Protein phosphatase PP2A regulatory subunit A	Protein phosphatase PP2A regulatory subunit A, partial	Protein phosphatase 2 (formerly 2A), regulatory subunit A
A10062	0.745667	Putative UDP-arabinose 4-epimerase 4	Hypothetical protein BATDEDRAFT_19996	Sterol-4alpha-carboxylate 3-dehydrogenase (decarboxylating) [EC:1.1.1.170]
A01855	0.747333	Isopentenyl-diphosphate Delta-isomerase 1	Isopentenyl pyrophosphate isomerase	Isopentenyl-diphosphate delta-isomerase [EC:5.3.3.2]
A14852	0.748	Uncharacterized GTP-binding protein YjiA	Hypothetical protein COCHEDRAFT_1174467	-
A15408	0.749667	-	-	-
A03046	0.752	Protein GVP36	Hypothetical protein VDAG_09027	-
A14504	0.754	Para-aminobenzoate synthase glutamine amidotransferase component II	Anthranilate synthase component ii	Anthranilate synthase / indole-3-glycerol phosphate synthase / phosphoribosylanthranilate isomerase [EC:4.1.3.27 4.1.1.48 5.3.1.24]
A12954	0.754333	40S ribosomal protein S8-B	Rps8Bp	Small subunit ribosomal protein S8e
A04382	0.754333	Mitogen-activated protein kinase SLT2/MPK1	MAP Kinase	Mitogen-activated protein kinase 7 [EC:2.7.11.24]
A11674	0.757	UPF0368 protein YPL225W	Hypothetical protein BATDEDRAFT_85735	D-lactate dehydrogenase (cytochrome) [EC:1.1.2.4]
A04508	0.758333	-	Hypothetical protein RO3G_15939	-
A01922	0.758667	Protein GCY	Hypothetical protein BATDEDRAFT_13322	-
A09318	0.759	Kynurenine/alpha-aminoadipate aminotransferase, mitochondrial	Hypothetical protein BATDEDRAFT_12325	Tryptophan aminotransferase [EC:2.6.1.27]
A00069	0.761333	Ubiquitin-conjugating enzyme E2 1	Chain A, Structure Of A Conjugating Enzyme-Ubiquitin Thiolester Complex	Ubiquitin-conjugating enzyme (huntingtin interacting protein 2) [EC:6.3.2.19]
A17971	0.762333	-	PH-response regulator protein palA/RIM20	Programmed cell death 6-interacting protein
A13395	0.762333	-	Hypothetical protein BATDEDRAFT_35212	Thioredoxin 1
A16661	0.762667	Drebrin	Putative actin binding protein	-
A00686	0.763	S-adenosylmethionine synthase	Hypothetical protein CPSG_01330	S-adenosylmethionine synthetase [EC:2.5.1.6]
A17532	0.764	UPF0652 protein	Hypothetical protein BATDEDRAFT_20825	-
A15762	0.764	3-isopropylmalate dehydrogenase	3-isopropylmalate dehydrogenase	-
A15198	0.766	-	-	-
A02900	0.766	Putative leucine--tRNA ligase, cytoplasmic	Hypothetical protein BATDEDRAFT_15609	Leucyl-tRNA synthetase [EC:6.1.1.4]
A02665	0.766	-	-	-
A00485	0.766	Lectin-D2	Hypothetical protein MGG_05351	Adenylate cyclase [EC:4.6.1.1]
A10130	0.766667	Proliferation-associated protein 2G4	Creatinase/aminopeptidase	Methionyl aminopeptidase [EC:3.4.11.18]
A05995	0.766667	Eukaryotic translation initiation factor 5B	Hypothetical protein RO3G_03429	Translation initiation factor 5B
A05830	0.767	Isoleucine--tRNA ligase, cytoplasmic	Hypothetical protein BATDEDRAFT_84552	Isoleucyl-tRNA synthetase [EC:6.1.1.5]
A07434	0.767	Importin subunit beta-3	Hypothetical protein PNEG_03183	Importin subunit beta-1
A09166	0.767667	Probable protein phosphatase 2C 33	Hypothetical protein BATDEDRAFT_36775	Protein phosphatase 2C homolog 2/3 [EC:3.1.3.16]
A14167	0.769333	NADH-dependent butanol dehydrogenase A	Alcohol dehydrogenase Adh4	Alcohol dehydrogenase [EC:1.1.1.1]
A14659	0.77	N-alpha-acetyltransferase 15, NatA auxiliary subunit	N-alpha-acetyltransferase 16, NatA auxiliary subunit	Peptide alpha-N-acetyltransferase [EC:2.3.1.88]
A11031	0.771	Probable protein phosphatase CG10417	Protein phosphatase 2C	Protein phosphatase 2C homolog 2/3 [EC:3.1.3.16]
A13054	0.772333	WD repeat-containing protein 1-B	Hypothetical protein MPER_07032	-
A00819	0.773	Chitinase 4	Brain chitinase and chia, putative	Chitinase [EC:3.2.1.14]
A00033	0.774333	cAMP-dependent protein kinase catalytic subunit gamma (Fragment)	Hypothetical protein BATDEDRAFT_36064	Protein kinase A [EC:2.7.11.11]
A18510	0.776	Vacuolar transporter chaperone 4	Unnamed protein product	Minichromosome maintenance protein 4 (cell division control protein 54)
A16619	0.777333	CTP synthase 2	CTP synthase	CTP synthase [EC:6.3.4.2]
A10585	0.777667	Phosphoribosyl-AMP cyclohydrolase	Tri-functional histidine biosynthesis protein	Phosphoribosyl-ATP pyrophosphohydrolase / phosphoribosyl-AMP cyclohydrolase / histidinol dehydrogenase [EC:3.6.1.31 3.5.4.19 1.1.1.23]
A00006	0.780333	Putative tyrosine-protein phosphatase R622	Hypothetical protein MPER_01682	Dual specificity phosphatase 12 [EC:3.1.3.16 3.1.3.48]
A07318	0.782	Orotidine 5'-phosphate decarboxylase	Orotidine-5'-monophosphate decarboxylase	Orotidine-5'-phosphate decarboxylase [EC:4.1.1.23]
A04188	0.782	-	Hypothetical protein BATDEDRAFT_91682	-
A07931	0.784333	NEDD8-activating enzyme E1 regulatory subunit	Amyloid beta protein binding protein, partial	Amyloid beta precursor protein binding protein 1
A16932	0.784667	Coatomer subunit beta'-2	Hypothetical protein BATDEDRAFT_18190	Coatomer protein complex, subunit alpha (xenin)
A01372	0.786	Proliferating cell nuclear antigen	Hypothetical protein PGTG_16695	Proliferating cell nuclear antigen
A05031	0.786	Trafficking protein particle complex subunit 2	Hypothetical protein BATDEDRAFT_8864	-
A16824	0.787	Trehalose phosphorylase	Clock-controlled gene-9 protein	-
A06127	0.787	Ubiquitin carboxyl-terminal hydrolase 15	Hypothetical protein RO3G_03305	Ubiquitin carboxyl-terminal hydrolase 7 [EC:3.1.2.15]
A17207	0.789	-	-	-
A16494	0.790333	Phosphomannomutase	Phosphomannomutase	Phosphomannomutase [EC:5.4.2.8]
A11110	0.790667	Probable phosphoserine phosphatase	Hypothetical protein BATDEDRAFT_12318	Phosphoserine phosphatase [EC:3.1.3.3]
A17270	0.790667	Bifunctional purine biosynthesis protein ADE17	Phosphoribosylaminoimidazolecarboxamide formyltransferase/IMP cyclohydrolase	Phosphoribosylaminoimidazolecarboxamide formyltransferase / IMP cyclohydrolase [EC:2.1.2.3 3.5.4.10]
A15354	0.792	Serine/threonine-protein phosphatase 2A activator	Hypothetical protein BATDEDRAFT_13523	Peptidylprolyl isomerase [EC:5.2.1.8]
A08993	0.792333	Nitrogen fixation protein NifU	Nfu1p	-
A12710	0.793333	Iron-sulfur cluster assembly protein 1	Piso0_002742	Nitrogen fixation protein NifU and related proteins
A17507	0.795	-	Hypothetical protein BATDEDRAFT_35458
A13049	0.795	Probable polyketide synthase 24	Polyketide synthase	Asperthecin polyketide synthase
A16097	0.795333	Putative nicotinamide N-methyltransferase	Related to NNT1-Putative nicotinamide N-methyltransferase, has a role in rDNA silencing and in lifespan determination	-
A15068	0.796333	FAM203 family protein C1020.12c	Hypothetical protein AOL_s00043g44	-
A01466	0.797333	Oxysterol-binding protein-like protein OBPalpha	Hypothetical protein RO3G_16403	Chloride channel, other eukaryote
A13067	0.798333	ATP-dependent RNA helicase eIF4A	DEAD-domain-containing protein	Translation initiation factor 4A
A03474	0.798667	Trafficking protein particle complex subunit BET3	Hypothetical protein BATDEDRAFT_29510	-
A15340	0.798667	L-aminoadipate-semialdehyde dehydrogenase-phosphopantetheinyl transferase	Hypothetical protein FG08779.1	4'-phosphopantetheinyl transferase [EC:2.7.8.-]
A10747	0.799333	Zinc finger CCCH domain-containing protein 12	Member of the CCCH zinc finger family	Translation initiation factor 5
A09857	0.799667	Mannose-6-phosphate isomerase	Mannose-6-phosphate isomerase	Mannose-6-phosphate isomerase [EC:5.3.1.8]
A12543	0.802667	Golgi to ER traffic protein 4	DUF410 domain protein	-
A08681	0.803	60S ribosomal protein L26 (Fragment)	60S ribosomal protein L26	Large subunit ribosomal protein L26e
A15583	0.805333	-	-	-
A02761	0.805333	Probable phenylalanine--tRNA ligase beta subunit	Hypothetical protein MPER_03810	Phenylalanyl-tRNA synthetase beta chain [EC:6.1.1.20]
A09838	0.806667	Rho guanine nucleotide exchange factor 10	Hypothetical protein RO3G_07625	-
A07027	0.806667	V-type proton ATPase 116 kDa subunit a isoform 1	Vacuolar H+-ATPase V0 sector, subunit a	V-type H+-transporting ATPase subunit I [EC:3.6.3.14]
A08998	0.806667	-	-	-
A01888	0.807667	Eukaryotic translation initiation factor 3 subunit E	Eukaryotic translation initiation factor 3 subunit EifCe, partial	Translation initiation factor 3 subunit E
A12245	0.807667	Synaptotagmin-like protein 1	Hypothetical protein BATDEDRAFT_92146	Phosphatidylserine decarboxylase [EC:4.1.1.65]
A10490	0.81	AP-1 complex subunit gamma	Hypothetical protein MPER_04875	AP-1 complex subunit gamma-1
A04141	0.810333	Serine/threonine-protein kinase 3	Hypothetical protein BATDEDRAFT_12840	Non-specific serine/threonine protein kinase [EC:2.7.11.1]
A10043	0.811333	WW domain-containing protein A	Chain A, Structure And Function Of A Ubiquitin Binding Site Within The Catalytic Domain Of A Hect Ubiquitin Ligase	E3 ubiquitin-protein ligase NEDD4 [EC:6.3.2.19]
A09817	0.811667	DNA replication licensing factor mcm6	Probable MCM6-involved in replication	Minichromosome maintenance protein 6
A03192	0.812	Uncharacterized protein yfbK	U-box domain-containing protein	-
A09380	0.815333	2-iminoacetate synthase	-	-
A09121	0.816333	Vacuolar protein sorting-associated protein 9a	Predicted protein	-
A09068	0.816667	Hydroxyacyl-coenzyme A dehydrogenase, mitochondrial	Hypothetical protein FPSE_05744	3-hydroxyacyl-CoA dehydrogenase [EC:1.1.1.35]
A17981	0.817	DEAD-box ATP-dependent RNA helicase 56	ATP dependent RNA helicase	ATP-dependent RNA helicase UAP56/SUB2 [EC:3.6.4.13]
A07861	0.819333	RWD domain-containing protein 1	Hypothetical protein PDIP_86030	-
A05321	0.819667	Dynein light chain 2, cytoplasmic	Cytoplasmic dynein light chain 2	Dynein light chain LC8-type
A10344	0.820667	Ribulose-phosphate 3-epimerase, cytoplasmic isoform	Hypothetical protein BATDEDRAFT_13975	Ribulose-phosphate 3-epimerase [EC:5.1.3.1]
A12203	0.820667	5'-3' exoribonuclease 2	Predicted protein	5'-3' exoribonuclease 1 [EC:3.1.13.-]
A16767	0.821	Ubiquitin-like modifier-activating enzyme 6	Predicted protein	Ubiquitin-like 1-activating enzyme E1 B [EC:6.3.2.19]
A09319	0.821	Eukaryotic translation initiation factor 3 subunit C	Unnamed protein product	Translation initiation factor 3 subunit C
A03296	0.827667	Cullin-1	Cullin	Cullin 1
A13738	0.829	Spermidine synthase	Spermidine synthase	Spermidine synthase [EC:2.5.1.16]
A03045	0.829667	Cullin-associated NEDD8-dissociated protein 1	Hypothetical protein TRV_02741	-
A03357	0.831333	Bud site selection protein 7	Hypothetical protein LEMA_P061210.1	-
A07470	0.832	Ankyrin repeat domain-containing protein 11	Ankyrin repeat-containing protein	-
A08932	0.833	Protein MKT1	Disulfide-isomerase tigA	Exonuclease 1 [EC:3.1.-.-]
A12886	0.834667	Large subunit GTPase 1 homolog	YALI0C21956p	Large subunit GTPase 1 [EC:3.6.1.-]
A00347	0.836667	-	Hypothetical protein BATDEDRAFT_22501	-
A13124	0.839667	Transcription initiation factor TFIID subunit 5	Hypothetical protein BATDEDRAFT_36260	Ribosome assembly protein SQT1
A09063	0.841	Protein sly1	Hypothetical protein BATDEDRAFT_9927	Syntaxin-binding protein 1
A09091	0.858667	Elongation of fatty acids protein 2	GNS1/SUR4 membrane protein	Fatty acid elongase 2 [EC:2.3.1.-]
A16256	0.874667	Septin homolog spn2	Hypothetical protein BATDEDRAFT_35039	Sporulation-regulated protein 3
A00694	1.18067	Putative glucose-6-phosphate 1-epimerase	Hypothetical protein PIIN_11868	Glucose-6-phosphate 1-epimerase [EC:5.1.3.15]
A07730	1.184	Uncharacterized mitochondrial carrier C12D12.05c	Hypothetical protein RO3G_12204	Mitochondrial ornithine carrier protein
A03274	1.19367	Trans-2-enoyl-CoA reductase, mitochondrial	Mitochondrial enoyl reductase, putative	Mitochondrial trans-2-enoyl-CoA reductase [EC:1.3.1.38]
A15407	1.19433	Protein DJ-1	Hypothetical protein BATDEDRAFT_90689	Protein DJ-1
A00144	1.19733	Copine-E	Tcb1p	-
A12727	1.20267	Annexin A5	Annexin xiv	-
A15339	1.20333	-	Hypothetical protein SNOG_14222	-
A15613	1.20433	-	Hypothetical protein RO3G_07607	-
A04206	1.206	Beta-adaptin-like protein C	Hypothetical protein RO3G_00473	AP-3 complex subunit beta
A02706	1.20633	-	Hypothetical protein RO3G_11882	-
A15771	1.21	Neurolysin, mitochondrial	Hypothetical protein RO3G_08916	Saccharolysin [EC:3.4.24.37]
A02040	1.21267	-	-	-
A08988	1.21533	Exocyst complex component sec6	Hypothetical protein BATDEDRAFT_13787	Exocyst complex component 3
A02765	1.218	Aminopeptidase N (Fragment)	Hypothetical protein BATDEDRAFT_34313	Aminopeptidase [EC:3.4.11.-]
A03439	1.219	RNA polymerase II-associated factor 1 homolog	Hypothetical protein BATDEDRAFT_25627	RNA polymerase II-associated factor 1
A05300	1.22	WD repeat-containing protein 43	Hypothetical protein NDAI_0C01330	U3 small nucleolar RNA-associated protein 5
A02511	1.222	Thioredoxin-1	Chain A, Solution Structure Of The A' Domain Of Thermophilic Fungal Protein Disulfide Isomerase	Protein disulfide-isomerase A1 [EC:5.3.4.1]
A10584	1.223	Ras suppressor protein 1	Hypothetical protein BATDEDRAFT_5797	Adenylate cyclase [EC:4.6.1.1]
A18442	1.22467	3-ketoacyl-CoA reductase	Hypothetical protein BN14_03329	Beta-keto reductase [EC:1.1.1.-]
A13816	1.22533	Proprotein convertase subtilisin/kexin type 6	Hypothetical protein SCHCODRAFT_66281	-
A08721	1.22733	Myosin-11 (Fragments)	Hypothetical protein MYCGRDRAFT_99481	Myosin heavy chain
A14232	1.23033	5'-AMP-activated protein kinase subunit beta-1	Hypothetical protein HMPREF1120_06500	-
A16213	1.231	Dynein beta chain, ciliary	Hypothetical protein BATDEDRAFT_27665	Dynein heavy chain 1, cytosolic
A11061	1.23133	-	-	-
A06839	1.23167	tRNA (uracil-5-)-methyltransferase homolog A	Hypothetical protein RO3G_02655	tRNA (uracil-5-)-methyltransferase [EC:2.1.1.35]
A11599	1.23233	Nucleolar protein 6	YGR090Wp-like protein	U3 small nucleolar RNA-associated protein 22
A11001	1.23333	Long-chain-fatty-acid--CoA ligase 5	LONG CHAIN FATTY ACID CoA LIGASE	Long-chain acyl-CoA synthetase [EC:6.2.1.3]
A17733	1.23367	Chitin deacetylase 2	Polysaccharide deacetylase family protein	Chitin deacetylase [EC:3.5.1.41]
A01937	1.23667	-	-	-
A03219	1.23667	-	Hypothetical protein RO3G_01117	-
A05840	1.237	Eukaryotic translation initiation factor 2A	Hypothetical protein MPER_14209	Translation initiation factor 2A
A12381	1.23733	Retinol dehydrogenase 13	Retinol dehydrogenase	-
A10770	1.23733	-	-	-
A03015	1.23833	Pre-mRNA-splicing factor cwf22	Hypothetical protein BATDEDRAFT_89594	Pre-mRNA-splicing factor CWC22
A17685	1.23933	H/ACA ribonucleoprotein complex subunit 4	Hypothetical protein MELLADRAFT_25274	H/ACA ribonucleoprotein complex subunit 4 [EC:5.4.99.-]
A02846	1.24267	-	-	-
A03648	1.247	Acyl-coenzyme A thioesterase 1	-	-
A09173	1.24767	Tropomyosin	Tropomyosin	Kinesin family member C1
A09855	1.248	Protein YIPF6 homolog	Hypothetical protein BATDEDRAFT_84709	-
A00173	1.248	-	Hypothetical protein RO3G_08029	-
A09421	1.24833	Macrophage migration inhibitory factor homolog	Tautomerase/MIF	Phenylpyruvate tautomerase [EC:5.3.2.1]
A08870	1.24967	-	Alpha/beta-hydrolase	-
A06699	1.251	Uncharacterized protein B0303.7	Hypothetical protein BATDEDRAFT_91681	-
A10702	1.25133	Poly(A)+ RNA export protein	Hypothetical protein RO3G_03984	mRNA export factor
A03417	1.252	Probable dipeptidyl-peptidase 5	Hypothetical protein MPER_12122	Dipeptidyl aminopeptidase [EC:3.4.14.-]
A09031	1.25367	Probable 26S proteasome non-ATPase regulatory subunit 8	Hypothetical protein BATDEDRAFT_84779	26S proteasome regulatory subunit N12
A02577	1.25533	ER-derived vesicles protein erv14	Hypothetical protein UM02871.1	-
A12476	1.25967	ABC transporter A family member 1	ATP-binding cassette sub-family A member 8-A, partial	ATP-binding cassette, subfamily B (MDR/TAP), member 1
A14929	1.26067	Protein sel-1 homolog 2	Extracellular protein SEL-1 and related proteins	SEL1 protein
A03779	1.26067	-	-	-
A07086	1.261	Mitochondrial import inner membrane translocase subunit tim50	Related to TIM50-mitochondrial inner membrane import translocase subunit	Carboxy-terminal domain RNA polymerase II polypeptide A small phosphatase [EC:3.1.3.16]
A15224	1.263	Protein disulfide-isomerase	Hypothetical protein MELLADRAFT_116816	Protein disulfide-isomerase A1 [EC:5.3.4.1]
A08289	1.26367	Thioredoxin reductase	Hypothetical protein	Thioredoxin reductase (NADPH) [EC:1.8.1.9]
A01821	1.26367	Endoglucanase B	Cellulase	Endoglucanase [EC:3.2.1.4]
A00511	1.26433	Putative 12-oxophytodienoate reductase 9	Putative nadh-dependent flavin protein	-
A12679	1.267	Translational activator GCN1	Translational activator GCN1	Elongation factor 3
A00495	1.26833	Nucleotide exchange factor SIL1	Hypothetical protein CLUG_00917	Nucleotide exchange factor SIL1
A10481	1.269	Growth arrest-specific protein 8 homolog	-	-
A17569	1.26933	Protein tumorous imaginal discs, mitochondrial	Hypothetical protein PGUG_04241	DnaJ-related protein SCJ1
A01063	1.27	Uridine-cytidine kinase 2	Uridine-cytidine kinase	Uridine kinase [EC:2.7.1.48]
A07773	1.27233	Nucleoporin nup44	Hypothetical protein BATDEDRAFT_89228	Nuclear pore complex protein Nup54
A11917	1.273	Demethylmenaquinone methyltransferase	UbiE/COQ5 methyltransferase, putative	Sterol 24-C-methyltransferase [EC:2.1.1.41]
A12589	1.27333	-	Hypothetical protein E5Q_03606	-
A04022	1.27333	Renin receptor	Hypothetical protein PGUG_04061	-
A02072	1.27467	-	-	-
A16244	1.27733	-	-	-
A05251	1.27767	-	-	-
A08592	1.278	-	-	-
A00345	1.279	-	-	-
A10723	1.279	-	-	-
A13117	1.28033	Protein sey1	Hypothetical protein PNEG_00969	-
A08134	1.28033	V-type ATP synthase subunit I	Hypothetical protein MPER_02062	V-type H+-transporting ATPase subunit I [EC:3.6.3.14]
A03571	1.284	Putative permease ygfQ	Purine transporter	Putative MFS transporter, AGZA family, xanthine/uracil permease
A05832	1.28433	Glyceraldehyde-3-phosphate dehydrogenase (Fragment)	Glyceraldehyde-3-phosphate dehydrogenase	Glyceraldehyde 3-phosphate dehydrogenase [EC:1.2.1.12]
A17728	1.28467	-	Hypothetical protein BATDEDRAFT_24491	-
A13259	1.28467	-	Hypothetical protein FOXB_04983	-
A15564	1.288	ER membrane protein complex subunit 2-A	Hypothetical protein BATDEDRAFT_34325	-
A12420	1.29033	Protein disulfide-isomerase 1	Hypothetical protein DOTSEDRAFT_69688	Protein disulfide-isomerase A6 [EC:5.3.4.1]
A01817	1.291	Extracellular matrix protein FRAS1	Hypothetical protein AGABI1DRAFT_69401	-
A16204	1.29133	GPI transamidase component PIG-S	Hypothetical protein BATDEDRAFT_7967, partial	Phosphatidylinositol glycan, class S
A06120	1.29367	-	Hypothetical protein RO3G_10906	-
A06531	1.294	Rho GDP-dissociation inhibitor	Hypothetical protein RO3G_14141	Rho GDP-dissociation inhibitor
A00070	1.29833	-	-	-
A13118	1.302	Deoxyuridine 5'-triphosphate nucleotidohydrolase	dUTPase (Dut), putaive	dUTP pyrophosphatase [EC:3.6.1.23]
A09873	1.303	Protein MEMO1	Hypothetical protein BATDEDRAFT_18471	-
A16380	1.303	Uncharacterized protein PA2218	Hypothetical protein SNOG_09731	-
A14660	1.303	Probable crotonobetaine/carnitine-CoA ligase	Hypothetical protein WALSEDRAFT_50428	Long-chain acyl-CoA synthetase [EC:6.2.1.3]
A05490	1.30333	Hexose transporter 2	Sugar transporter	MFS transporter, SP family, sugar:H+ symporter
A09077	1.30433	Mycosubtilin synthase subunit A	Hypothetical protein RO3G_05368	Long-chain acyl-CoA synthetase [EC:6.2.1.3]
A01863	1.30633	Bifunctional xylanase/deacetylase	Hypothetical protein GGTG_14133	Chitin deacetylase [EC:3.5.1.41]
A11575	1.307	Uncharacterized protein aq_2135	Hypothetical protein COCSADRAFT_199303, partial	Hydroxyacylglutathione hydrolase [EC:3.1.2.6]
A02089	1.30767	Hypoxanthine-guanine phosphoribosyltransferase	Hypothetical protein RO3G_10449	-
A17517	1.308	Serine hydroxymethyltransferase, mitochondrial	Serine hydroxymethyltransferase, cytosolic	Glycine hydroxymethyltransferase [EC:2.1.2.1]
A03319	1.30833	Vesicle-associated protein 1-1	Hypothetical protein CNBK0490	-
A14860	1.30833	Mannan endo-1,4-beta-mannosidase B	Putative cellulase	-
A11000	1.30867	Long chain acyl-CoA synthetase 7, peroxisomal	Hypothetical protein RO3G_10443	Long-chain acyl-CoA synthetase [EC:6.2.1.3]
A18298	1.30867	2,6-dihydropseudooxynicotine hydrolase	Dipeptidyl aminopeptidase	-
A08873	1.31133	Endoglucanase B	Putative cellulase	Endoglucanase [EC:3.2.1.4]
A10610	1.31267	Hydroxysteroid 11-beta-dehydrogenase 1-like protein A	3-ketoacyl-acyl carrier protein reductase	3-oxoacyl-[acyl-carrier protein] reductase [EC:1.1.1.100]
A05382	1.31267	-	Hypothetical protein RO3G_15939	-
A08934	1.313	Annexin A4	Annexin	-
A14388	1.31433	-	Hypothetical protein RO3G_15939	-
A06315	1.31567	Chitin synthase 1 (Fragment)	Glycosyltransferase family 2 protein	Chitin synthase [EC:2.4.1.16]
A05143	1.316	UDP-glucose 4-epimerase	NAD(P)-binding protein	UDP-glucose 4-epimerase / aldose 1-epimerase [EC:5.1.3.2 5.1.3.3]
A09943	1.31633	Calmodulin	Calmodulin and related proteins	Calmodulin
A07276	1.32033	-	-	-
A08011	1.32033	Probable rRNA-processing protein ebp2	Hypothetical protein AOL_s00004g473	rRNA-processing protein EBP2
A17246	1.32067	Transketolase 1	Transketolase TktA	Transketolase [EC:2.2.1.1]
A15236	1.32233	Superoxide dismutase [Fe]	Manganese superoxide dismutase, partial	Superoxide dismutase, Fe-Mn family [EC:1.15.1.1]
A08186	1.32667	Inner spore coat protein H	Hypothetical protein RO3G_00454	-
A16918	1.329	Endo-1,4-beta-xylanase A	Endo-1,4-beta-xylanase A	Endo-1,4-beta-xylanase [EC:3.2.1.8]
A02730	1.329	Phosphatidylinositol 4-phosphate 5-kinase its3	Phosphatidylinositol-4-phosphate 5-kinase	1-phosphatidylinositol-4-phosphate 5-kinase [EC:2.7.1.68]
A11481	1.33		Hypothetical protein BATDEDRAFT_91564	ATP-dependent Clp protease, protease subunit [EC:3.4.21.92]
A12273	1.33	Uncharacterized oxidoreductase ykvO	Sorbose reductase SOU1	-
A02358	1.33467	Nascent polypeptide-associated complex subunit beta	Nascent polypeptide-associated complex subunit beta	Nascent polypeptide-associated complex subunit beta
A08994	1.33467	Mitochondrial outer membrane protein porin	Hypothetical protein BATDEDRAFT_33174	Voltage-dependent anion channel protein 2
A07377	1.33633	-	-	-
A03223	1.338	Chitin synthase D	Chitin synthase F	Chitin synthase [EC:2.4.1.16]
A08806	1.33867	Alpha-latroinsectotoxin-Lt1a (Fragment)	Hypothetical protein TRIATDRAFT_217580	26S proteasome non-ATPase regulatory subunit 10
A01625	1.339	Lectin-D2	Hypothetical protein	Glutathione S-transferase [EC:2.5.1.18]
A09887	1.341	Putative aminopeptidase C13A11.05	Hypothetical protein PGTG_22457	Cytosol aminopeptidase [EC:3.4.11.1 3.4.11.5]
A11996	1.34167	-	-	-
A02843	1.34267	Uncharacterized pyrophosphatase/phosphodiesterase C725.05c	Hypothetical protein NDAI_0G04920	-
A06150	1.34467	Calmodulin-like protein	Calcium-binding EF-hand	Solute carrier family 25 (mitochondrial phosphate transporter), member 23/24/25/41
A16664	1.345	Inorganic phosphate transport protein PHO88	Inorganic phosphate transporter	-
A11263	1.34667	Arginase	Hypothetical protein KAFR_0J00100	Arginase [EC:3.5.3.1]
A17886	1.34933	Charged multivesicular body protein 5	Charged multivesicular body protein 5	Charged multivesicular body protein 5
A14134	1.34933	Protein LURP-one-related 10	Hypothetical protein AG1IA_10430	-
A18015	1.35	Chitin synthase 5	Hypothetical protein BATDEDRAFT_10396, partial	Chitin synthase [EC:2.4.1.16]
A18621	1.354	SH3 domain-containing RING finger protein 3	Hypothetical protein TBLA_0I01080	-
A07111	1.356	Protein disulfide-isomerase like 2-1	Mpd1p	Protein disulfide-isomerase A6 [EC:5.3.4.1]
A10859	1.357	UPF0378 protein KIAA0100	Hypothetical protein BATDEDRAFT_89946	-
A15058	1.35833	Ras-like protein	Ras GTPase	Ras family, other
A01498	1.35933	Nod factor export ATP-binding protein I	Hypothetical protein BATDEDRAFT_10172	ATP-binding cassette, subfamily B (MDR/TAP), member 1
A11669	1.363	Probable formate transporter	Hypothetical protein KNAG_0C05670	Nitrite transporter NirC
A00608	1.364	-	-	-
A16271	1.36833	Endoglucanase B	Endoglucanase B	-
A17607	1.372	Enhancer of rudimentary homolog	Hypothetical protein BATDEDRAFT_89895	-
A15710	1.37233	Severin	Gelsolin-like protein 1 AltName: Full=Actin-modulator	Gelsolin
A09062	1.37267	Surfeit locus protein 4	Surfeit locus protein 4	-
A01653	1.37933	-	-	-
A10184	1.38067	-	-	-
A15009	1.381	-	-	-
A05917	1.38133	ABC transporter A family member 1	Hypothetical protein	ATP-binding cassette, subfamily B (MDR/TAP), member 1
A09099	1.38333	-	-	-
A05079	1.38467	Putative ankyrin repeat protein MM_0045	Ankyrin repeat domain-containing protein 50	-
A10822	1.388	Endo-1,4-beta-xylanase A	Endo-1,4-beta-xylanase	-
A07432	1.38833	Inner spore coat protein H	Hypothetical protein RO3G_11882	-
A12418	1.39167	Rhamnogalacturonan acetylesterase	Rhamnogalacturonan acetylesterase	Rhamnogalacturonan acetylesterase [EC:3.1.1.86]
A14687	1.39267	Long-chain-fatty-acid--CoA ligase 6	Long-chain-fatty-acid-CoA ligase	Long-chain acyl-CoA synthetase [EC:6.2.1.3]
A02105	1.393	Endo-1,4-beta-xylanase A	Endo-1,4-beta-xylanase A	Endo-1,4-beta-xylanase [EC:3.2.1.8]
A10183	1.39933	Protein transport protein SEC9	Hypothetical protein PGTG_12935	Synaptosomal-associated protein, 23kDa
A07114	1.405	-	Hypothetical protein RO3G_00076	-
A14009	1.40667	Calmodulin	Putative calmodulin protein	Calmodulin
A11218	1.40733	Endo-1,4-beta-xylanase A	Putative cellulase	Endoglucanase [EC:3.2.1.4]
A09215	1.40933	-	-	-
A02180	1.41033	Mannan endo-1,4-beta-mannosidase B	Putative cellulase	-
A05497	1.41067	Endoglucanase B	Putative cellulase	-
A09059	1.412	Heterogeneous nuclear ribonucleoprotein D-like	RNA-binding domain-containing protein	Transformer-2 protein
A04258	1.41267	Chitooligosaccharide deacetylase	Chitin deacetylase	Chitin deacetylase [EC:3.5.1.41]
A04448	1.413	-	Hypothetical protein SERLADRAFT_471162	-
A03208	1.414	Bifunctional endo-1,4-beta-xylanase A	Cellobiohydrolase C8	-
A12537	1.41433	-	-	-
A02753	1.41467	Putative G3BP-like protein	Ubiquitin protease cofactor Glp1 (predicted)	-
A02907	1.417	40S ribosomal protein S21	Hypothetical protein BATDEDRAFT_10024, partial	Small subunit ribosomal protein S21e
A03826	1.422	Copine-7	-	-
A01432	1.42733	Ornithine carbamoyltransferase, mitochondrial	Mitochondrial ornithine carbamoyltransferase	Ornithine carbamoyltransferase [EC:2.1.3.3]
A12111	1.42867	J domain-containing protein APJ1	Chaperone protein	DnaJ homolog subfamily A member 2
A06229	1.431	-	-	-
A17737	1.43433	17.8 kDa class I heat shock protein	Small heat shock protein	HSP20 family protein
A09170	1.43633	Ribosome biogenesis regulatory protein homolog	Hypothetical protein BATDEDRAFT_6086	Regulator of ribosome biosynthesis
A14144	1.43667	-	-	-
A04859	1.441	-	-	-
A05167	1.44167	-	-	-
A01281	1.44533	-	-	-
A03526	1.44733	Copine-5	-	-
A16896	1.44933	-	Hypothetical protein RO3G_15939	-
A14727	1.451	-	-	-
A09564	1.45233	-	Hypothetical protein RO3G_04189	-
A10521	1.46433	Ubiquitin-like protein 3	Hypothetical protein BATDEDRAFT_92735	-
A12133	1.46567	Endochitinase 1	Class V chitinase, putative	Glutathione S-transferase [EC:2.5.1.18]
A00175	1.46833	AdoMet-dependent rRNA methyltransferase SPB1	Hypothetical protein HCAG_02622	AdoMet-dependent rRNA methyltransferase SPB1 [EC:2.1.1.-]
A08087	1.47267	Protein disulfide-isomerase	Thioredoxin-domain-containing protein	Protein disulfide-isomerase A1 [EC:5.3.4.1]
A17172	1.48167	Lectin-C	Glycosyl hydrolase, family 18	Glutathione S-transferase [EC:2.5.1.18]
A13726	1.48333	E3 ubiquitin-protein ligase SH3RF1	Hypothetical protein SPAPADRAFT_70602	-
A05244	1.493	Na(+)/H(+) antiporter	Hypothetical protein BATDEDRAFT_14293	-
A05068	1.49967	-	Extracellular serine-rich protein	-
A11409	1.50467	Thioredoxin	Pc21g06110	Thioredoxin 1
A11882	1.50467	Vesicle-associated protein 2-2	VAMP-associated protein	-
A03977	1.50933	Copine-E	Hypothetical protein NCAS_0A06150	-
A13891	1.51533	Carboxylesterase 5A (Fragment)	Carboxylesterase	Carboxylesterase 2 [EC:3.1.1.1 3.1.1.84 3.1.1.56]
A08111	1.52233	E3 ubiquitin-protein ligase SH3RF1	Hypothetical protein BATDEDRAFT_36031	-
A01602	1.52567	Hypersensitive-induced response protein 1	Hypothetical protein UREG_03461	Protein HIRA/HIR1
A00456	1.53633	Inner spore coat protein H	Hypothetical protein RO3G_08029	-
A04386	1.538	Protein HflK	SPFH domain / Band 7 family protein	-
A01348	1.53833	6-phospho-beta-galactosidase	Beta-glucosidase Cel1B, partial	Beta-glucosidase [EC:3.2.1.21]
A16737	1.54	-	-	-
A00603	1.54967	Nuclear pore complex protein Nup153	Predicted protein	CDK inhibitor PHO81
A18545	1.54967	Cytosol non-specific dipeptidase	Putative aminoacyl-histidine dipeptidase	-
A05637	1.56167	ER membrane protein complex subunit 8/9 homolog	UPF0172-domain-containing protein	-
A04882	1.56867	-	Protein disulfide isomerase	Protein disulfide-isomerase A1 [EC:5.3.4.1]
A07120	1.57533	Chitin-binding lectin 1	Class V chitinase, putative	Chitinase [EC:3.2.1.14]
A06874	1.58067	Adenylyltransferase and sulfurtransferase UBA4	Hypothetical protein RO3G_06521	Adenylyltransferase and sulfurtransferase
A02916	1.584	Endoglucanase B	1,4-beta-D-glucan-4-glucanohydrolase	Endoglucanase [EC:3.2.1.4]
A07173	1.58567	Ankyrin repeat domain-containing protein 5	Ankyrin repeat protein	26S proteasome non-ATPase regulatory subunit 10
A03410	1.59667	Aldose 1-epimerase	Hypothetical protein BATDEDRAFT_29046	Aldose 1-epimerase [EC:5.1.3.3]
A04318	1.60267	Lectin-D2	Carbohydrate esterase family 4 protein	Chitinase [EC:3.2.1.14]
A01667	1.604	Eukaryotic translation initiation factor 3 subunit J	Hypothetical protein BATDEDRAFT_86809	-
A13260	1.628	-	Extracellular serine-rich protein, putative	-
A15677	1.63267	Dolichyl-phosphate-mannose--protein mannosyltransferase 4	Mannosyltransferase PMTI	Dolichyl-phosphate-mannose-protein mannosyltransferase [EC:2.4.1.109]
A16747	1.637	Uncharacterized 30.6 kDa protein in fumA 3'region	Deacetylase	Chitin deacetylase [EC:3.5.1.41]
A11446	1.64467	Protein disulfide isomerase-like 1-3	Hypothetical protein Ecym_7388	Thioredoxin 1
A00363	1.65767	-	-	-
A17552	1.658	-	-	-
A14130	1.66633	Lysosomal acid phosphatase	Hypothetical protein VCUG_02244	Acid phosphatase [EC:3.1.3.2]
A03228	1.68167	Protein disulfide-isomerase (Fragment)	Disulfidisomerase	Protein disulfide-isomerase A6 [EC:5.3.4.1]
A05400	1.68867	Transaldolase (Fragment)	Transaldolase	Transaldolase [EC:2.2.1.2]
A12977	1.689	Root-specific lectin	Hypothetical protein	Chitinase [EC:3.2.1.14]
A09878	1.70033	Severin	Gelsolin domain-containing putative protein	Gelsolin
A13721	1.70267	-	-	-
A02719	1.705	Endo-1,4-beta-xylanase A	Xylanase	Endo-1,4-beta-xylanase [EC:3.2.1.8]
A04195	1.705	Mannan endo-1,4-beta-mannosidase C	Glycosyl hydrolase family 6 exoglucanase	-
A12004	1.71	-	-	-
A11958	1.71433	ATP-binding cassette sub-family A member 1	ATP-binding cassette sub-family A member 8-A, partial	ATP-binding cassette, subfamily B (MDR/TAP), member 1
A01357	1.71533	Uncharacterized 30.6 kDa protein in fumA 3'region	Hypothetical protein RO3G_16202	Chitin deacetylase [EC:3.5.1.41]
A06295	1.72067	Thioredoxin	Pc21g06110	Thioredoxin 1
A09017	1.73	Uncharacterized 30.6 kDa protein in fumA 3'region	Hypothetical protein RO3G_16202	Chitin deacetylase [EC:3.5.1.41]
A01647	1.73267	Subtilisin-like protease 4	Peptidase 1	Subtilase-type proteinase RRT12 [EC:3.4.21.-]
A12584	1.74133	-	-	-
A04235	1.74367	Chitinase A1	Endochitinase	Chitinase [EC:3.2.1.14]
A15653	1.74367	Klotho	Beta-glucosidase	Beta-glucosidase [EC:3.2.1.21]
A13370	1.752	Bifunctional endo-1,4-beta-xylanase A	Acetylxylan esterase	-
A01296	1.76267	Cholinesterase (Fragment)	Carboxylesterase family protein	Carboxylesterase 2 [EC:3.1.1.1 3.1.1.84 3.1.1.56]
A01256	1.76567	-	Hypothetical protein BATDEDRAFT_89937	-
A01190	1.778	Elongation factor Tu	Mitochondrial translation elongation factor tu	Elongation factor Tu
A00416	1.78733	Endo-1,4-beta-xylanase A	Xylanase	Endo-1,4-beta-xylanase [EC:3.2.1.8]
A09307	1.79433	Acyl-CoA-binding protein homolog 1	Acyl-CoA-binding protein 2	Diazepam-binding inhibitor (GABA receptor modulator, acyl-CoA-binding protein)
A02479	1.795	Mannan endo-1,4-beta-mannosidase B	Cellulase Cel9A precursor	Endoglucanase [EC:3.2.1.4]
A05824	1.803	Chitin-binding lectin 1	Glycosyl hydrolase family 18	Glutathione S-transferase [EC:2.5.1.18]
A04287	1.80467	-	-	-
A04706	1.807	Putative hexose transporter 12	Hypothetical protein TBLA_0F01600	MFS transporter, SP family, sugar:H+ symporter
A18657	1.81033	EF-hand domain-containing protein 1	Hypothetical protein BATDEDRAFT_35155	-
A10361	1.83033	-	Hypothetical protein RO3G_01117	-
A11651	1.85667	-	-	-
A09563	1.86467	-	Hypothetical protein RO3G_15939	-
A11859	1.87533	Bifunctional xylanase/deacetylase	Hypothetical protein GGTG_14133	Chitin deacetylase [EC:3.5.1.41]
A11271	1.89667	Beta-glucosidase	Beta-glucosidase	-
A08909	1.9	Thermostable beta-glucosidase B	Beta-glucosidase	Beta-glucosidase [EC:3.2.1.21]
A06756	1.961	Subtilase-type proteinase psp3	Hypothetical protein AOL_s00080g47	-
A00805	1.991	Glyoxal reductase	DEHA2F02948p	Alcohol dehydrogenase (NADP+) [EC:1.1.1.2]
A04365	1.99733	Protein H	Hypothetical protein BATDEDRAFT_87290	-
A02641	2.005	LisH domain-containing protein C1711.05	Hypothetical protein SCHCODRAFT_51001	-
A06460	2.03567	Uncharacterized 30.6 kDa protein in fumA 3'region	Hypothetical protein SNOG_15047	Chitin deacetylase [EC:3.5.1.41]
A17749	2.04033	Inner spore coat protein H	Hypothetical protein BATDEDRAFT_86155	Chitinase [EC:3.2.1.14]
A08705	2.07567	Beta-glucosidase	Beta-glucosidase	Beta-glucosidase [EC:3.2.1.21]
A06180	2.08733	Lectin-D2	Putative glycosyl family protein	Chitinase [EC:3.2.1.14]
A00812	2.108	-	Hypothetical protein FOXB_00994	Chitin deacetylase [EC:3.5.1.41]
A11692	2.15167	Endochitinase	Root-specific lectin	Chitinase [EC:3.2.1.14]
A03509	2.17633	Glucose-repressible alcohol dehydrogenase transcriptional effector	Hypothetical protein VICG_00233	CCR4-NOT transcription complex subunit 6
A10968	2.208	-	-	-
A01140	2.235	Pore membrane protein of 33 kDa	Hypothetical protein SPAPADRAFT_145755	-
A12837	2.29367	-	-	-
A10057	2.30133	-	-	-
A05393	2.358	High-affinity glucose transporter ght5	Hypothetical protein NDAI_0F01930	MFS transporter, SP family, sugar:H+ symporter
A08706	2.44267	Beta-glucosidase	Beta-glucosidase	Beta-glucosidase [EC:3.2.1.21]
A10456	2.54367	Probable glucose transporter HXT5	Hypothetical protein TDEL_0E02300	MFS transporter, SP family, sugar:H+ symporter
A17203	2.62633	-	-	-
A06268	2.696	Tubulin-specific chaperone A	Tubulin binding cofactor A	-
A14498	2.832	ABC transporter A family member 1	ATP-binding cassette sub-family A member 8-A, partial	ATP-binding cassette, subfamily B (MDR/TAP), member 1
A01230	2.87167	-	-	-
A07467	2.94	Extracellular matrix protein FRAS1	-	-
A06767	3.23067	-	Hypothetical protein AOR_1_78074	Triacylglycerol lipase [EC:3.1.1.3]
A10870	3.42067	-	-	-
A08103	3.653	D-xylose-proton symporter	Hypothetical protein CERSUDRAFT_87353	MFS transporter, SP family, sugar:H+ symporter
A01843	3.83567	Uncharacterized symporter ynaJ	-	-
A15978	4.247	Uncharacterized symporter ynaJ	-	-
